# Supplementary material
Source: Royal Society of Chemistry journal article supplement (doi:10.1039/d5md00988j)
Supplement: d5md00988j1.pdf [file d5md00988j1.pdf]

## Supporting information

### From Alphafold to site-selective inhibition of DNA methylation in glioblastoma multiforme

Jean-Maxime Besson,<sup>a</sup> Alain Chavanieu,<sup>a</sup> Arulraj Nadaradjane,<sup>b c d</sup> Pierre-François Cartron,<sup>b c d</sup> and  
Marie Lopez\*<sup>a</sup>

<sup>a</sup> Institut des Biomolécules Max Mousseron (IBMM), UMR 5247, CNRS-Université de Montpellier-ENSCM, 1919 route de Mende, 34296 Montpellier cedex 5, France

<sup>b</sup> Nantes Université, Inserm UMR 1307, CNRS UMR 6075, Université d'Angers, CRCI2NA, F-44000 Nantes – France

<sup>c</sup> Institut de Cancérologie de l'Ouest, F-44805 Saint-Herblain, France

<sup>d</sup> EpICO – Plateforme Epigénétique/Epitranscriptomique, Institut de Cancérologie de l'Ouest, F-44805, Saint-Herblain, France

|                                                                                                                 |    |
|-----------------------------------------------------------------------------------------------------------------|----|
| I. Protein visualisation and alphafold multimer prediction.....                                                 | 2  |
| AlphaFold Prediction .....                                                                                      | 2  |
| II. Peptide characterisation.....                                                                               | 14 |
| III. Peptide Spectra .....                                                                                      | 16 |
| IV..... Biological Evaluation                                                                                   |    |
| 26                                                                                                              |    |
| Cell lines and reagents.....                                                                                    | 26 |
| Measure of the 5-methylcytosine level on DNA.....                                                               | 26 |
| Gene methylation measurement by quantitative methylation-sensitive restriction enzyme<br>digestion (qMSRE)..... | 26 |
| Cellular viability by MTT assay.....                                                                            | 26 |
| Co-immunoprecipitation assay .....                                                                              | 27 |
| CHIP and re-CHIP assay .....                                                                                    | 27 |
| Doubling time.....                                                                                              | 27 |
| Invasion assay.....                                                                                             | 27 |
| Cell lysis.....                                                                                                 | 28 |

## I. Protein visualisation and AlphaFold multimer prediction

### AlphaFold Prediction

*AlphaFold2 complex prediction.* Protein-protein complex structure prediction was performed using the public available ColabFold (Mirdita *et al.* 2022; Jumper *et al.* 2021; Evans *et al.* 2021) [https://colab.research.google.com/github/sokrypton/ColabFold/blob/main/AlphaFold2.ipynb#scrollTo=\\_mbaIO9pWjaN0](https://colab.research.google.com/github/sokrypton/ColabFold/blob/main/AlphaFold2.ipynb#scrollTo=_mbaIO9pWjaN0) ). Amino acid sequences for human DNMT1 (UniProt : [AF-P26358-F1](#), 1-1616), DMAP1 (UniProtKB: [AF-Q9NPF5-F1](#), 1-467), USP7 (UniProt: [AF-Q9009-F1](#), 1-1102), CFP1 (UniProt, [AF-Q9P0U4-F1](#),1-656), UHRF1 (UniProt: [AF-Q96T88-F1](#), 1-793), Sp1 (UniProt, [AF-P08047-F1](#),1-785) and Stat3 (UniProt:[AF-P40763-F1](#), 1-770) were retrieved from UniProt. Previously proposed in literature interactions sequences were pasted to colab\_batch connected by “:” using the fasta file from Uniprot. The default parameters for MSA generations and the number of recycles (3) were used. For relaxed prediction, only the first model was relaxed using num\_relax: 1. The ColabFold was executed using T4 GPU under ColabFold pro account. Five models were generated for each prediction with the pLDDT (predicted Local Distance Difference Test) score (Mariani *et al.* 2013), a per-residue confidence score between 0 and 100. Generally, pLDDT scores above 90 are considered “very confident,” pLDDT scores between 70 and 90 are considered “confident,” pLDDT scores between 50 and 70 are “low confidence” and scores below 50 are considered “very low confidence” and may be unstructured. pLDDT score of each predicted model was visualized in Pymol by using the following github <https://github.com/cbalbin-bio/pymol-color-alphafold> . and by writing on the command prompt the following code:

```
run https://raw.githubusercontent.com/cbalbin-bio/pymol-color-alphafold/master/coloraf.py
from pymol import cmd
def coloraf(selection="all"):
    coloraf sele
    sele (all)
    cmd.color("blue", f'({selection}) and b > 90")
    cmd.color("cyan", f'({selection}) and b < 90 and b > 70")
    cmd.color("yellow", f'({selection}) and b < 70 and b > 50")
    cmd.color("orange", f'({selection}) and b < 50")
cmd.extend("coloraf", coloraf)
cmd.auto_arg[0]["coloraf"] = [cmd.object_sc, "object", ""]
```

ColabFold ranks the five models based on pLDDT scores, pTM (predicted Template Modelling), and ipTM (interface predicted Template Modelling). A pTM score above 0.5 indicates good overall folding of the complex, while a score below 0.5 suggests an incorrect structure. For the ipTM score, values above 0.8 denote high-confidence, high-quality predictions. Scores between 0.6 and 0.8 should be interpreted with caution, as the predictions may be accurate or incorrect. Scores below 0.6 likely indicate

a failed prediction. To evaluate how a prediction is reliable or not, a model confidence score could be calculated as follow:

$$\text{Model confidence} = (0,2 \times pTM + 0,8 \times ipTM) \times 100$$

A heat-map representation of the MSA indicates all sequences mapped. The colour scale indicates the identity score. White regions are not covered. The black line identifies the relative coverage of the sequence with respect to the total number of aligned sequences. Top-ranked model from the generated PDB file was used for further molecular visualization using Pymol. Each protein was distinguished by coloration. Protein-protein interaction was determined using Modify/Around/Atoms within 4 Å. Synthetised peptides were represented using stick. Pymol picture was downloaded using Ray (slow) at 300 DPI.

**Figure SI-1.** FASTA alignments of the protein sequence from PDB structure (PDB code: 4wxx, 351-1600) align with full sequence of AF model (UniProt : AF-P26358-F1, 1-1616) of DNMT1.

**4wxx\_model\_1**

```

-----
-----PKCIQCGQYLDDPDLKYGQHPPDAVDEPQMLTNE-----
-----
KALPQHKLTCFSVYCKHGHLCPIDTGLIEKNIELFFSGSAKPIYDDDDPSLEGGVNGKNLGPINEWWITGFDGGEKALI
GFSTSF AEYILMDPSPEYAPIFGLMQEKIYISKIVVEFLQSNDSSTYEDLINKIETTVPSPGLNLRFTEDSLLRHAQFV
VEQVESYDEAGDSDEQPIFLTPCMRDLIKLAGVTLGQRRRAQARRQT-----KATTTKLVYQIFDTFFAEQIEK-----
---
KRRRCGVCEVCQPECGKCKACKDMVKFVGGSGRSKQACQERRCPNMAMKEADDDEEVDNIPEMPSPKMMHQG
KKKKQKNRISWVGEAVKTDKKSYYKVCIDAETLEVGDVSVIPDDSSKPLYLARVTALWEDSSNGQMFHAHW
FCAGTDTVLGATSDPLELFLVDECEDMQLSYIHSKVKVIYKAPSENWAMEGGMDPESLLEGDDGKTYFYQLWYDQ
DYARFESPPKTQPTEDNKFKFCVSCARLAEMRQKEIPRVLEQLEDLSRVLYYSATKNGILYRVGDGVYLPPEAFTF
NI-----RKEPVDEDLYPEHYRKY-----
LDAPEPYRIGRIKEIFCPKKSNGRPNETDIKIRVKNFYRPENTHKSTPASYHADINLLYWSDEEAVVDFKAVQGRCTV
EYGEDLPECVQVYSMGGPNRFYFLEAYNAKSKSFEDPPNHARS-----
KLPKLR TLDFVSGCGLSEGFHQAGISDTLWAIEMWDPAQAQFRLNPNPGSTVFTEDCNILLKLV MAGETTNSRGQR
LPQKGDVEMLCGGPPCQGFSGMNRFNRSRTYSKFKNSLVV SFLSYCDYRPRFFLENVRFV SFKRSMVLKLT LRC
LVRMGYQCTFGVLQAGQYGV AQTRRRAILAAAPGKLP LFPEPLHVFAPRACQLSVVDDKKFVSNITRLSSGPF
TITVRDTMSDLPEVRNGASALEISYNGEPQSWFQRQLRGAQYQPILRDHICKDMSALVAARMRHIPLAPGSDWRDL
PNIEVRLSDGTMARKLRYTHHDRKNGRSSSGALRGVCSVCVEAGKACDPAARQFN TLIPWCLPHTGNRHNHWAGLY
GRLEWDGFFSTTVTNPEPMGKQGRVLHPEQHRVSVRECAR SQGFPD TYR LFGNILDKHRQVGN AVPPPLAKAIGL
EIKLCMLAKALTRVW-----

```

**sp|P26358|DNMT1\_HUMAN DNA (cytosine-5)-methyltransferase 1 OS=Homo sapiens  
OX=9606 GN=DNMT1 PE=1 SV=2**

```

MPARTAPARVPTLAVPAISLPDDVRRRLKDLERDSLTEKECVKEKLNLLHEFLQTEIKNQLCDLETCLRKEELSEEG
YLAKVKSLLNKDLSLENGAHAYNREVNGLRENGQARSEARRVGMADANSPPKPLSKPRTPRRSKSDGEAKPEPSP
SPRITRKSTRQTTITSHFAKGPAKRKPQEESERAKSDESIKEEDKDQDEKRRRVTSRERVARPLPAEERAKSGTRTE
KEEERDEKEEKRLRSQTKEPTPKQKLKEEPDREARAGVQADEDGDEKDEKHKRSQPKDLAAKRRPEEKEPEKV
NPQISDEKDEDEKEEKRRKTTPKEPTEKKMARAKTVMNSKTHPPKCIQCGQYLDDPDLKYGQHPPDAVDEPQMLT
NEKLSIFDANESGFESYEALPQHKLTCFSVYCKHGHLCPIDTGLIEKNIELFFSGSAKPIYDDDDPSLEGGVNGKNLGP
NEWWITGFDGGEKALIGFSTFAEYILMDPSPEYAPIFGLMQEKIYISKIVVEFLQSNDSSTYEDLINKIETTVPSPGLN
LNRFTEDSLLRHAQFVVEQVESYDEAGDSDEQPIFLTPCMRDLIKLAGVTLGQRRRAQARRQTIRHSTREKDRGPTKA
TTTKLVYQIFDTFFAEQIEKDDREDKENAFKRRRCGVCEVCQPECGKCKACKDMVKFVGGSGRSKQACQERRCPN
MAMKEADDDEEVDNIPEMPSPKMMHQGKKKKQKNRISWVGEAVKTDGKKSYYKVCIDAETLEVGDVSVIP
DDSSKPLYLARVTALWEDSSNGQMFHAHWFCAGTDTVLGATSDPLELFLVDECEDMQLSYIHSKVKVIYKAPSEN
WAMEGGMDPESLLEGDDGKTYFYQLWYDQDYARFESPPKTQPTEDNKFKFCVSCARLAEMRQKEIPRVLEQLEDL
DSRVLYYSATKNGILYRVGDGVYLPPEAFTFNILKSSPVKRPKEPVDEDLYPEHYRKYSDYIKGSNLDAPEPYRIGR
IKEIFCPKKSNGRPNETDIKIRVKNFYRPENTHKSTPASYHADINLLYWSDEEAVVDFKAVQGRCTVEYGEDLPECV
QVYSMGGPNRFYFLEAYNAKSKSFEDPPNHARSPGNKGGKGGKGGKPKSQACEPSEPEIEIKLPKLR TLDFVSGC
GLSEGFHQAGISDTLWAIEMWDPAQAQFRLNPNPGSTVFTEDCNILLKLV MAGETTNSRGQR LPQKGDVEMLCGGPP
CQGFSGMNRFNRSRTYSKFKNSLVV SFLSYCDYRPRFFLENVRFV SFKRSMVLKLT LRC LVRMGYQCTFGVLQA
GQYGV AQTRRRAILAAAPGKLP LFPEPLHVFAPRACQLSVVDDKKFVSNITRLSSGPFRTITVRDTMSDLPEVRN
GASALEISYNGEPQSWFQRQLRGAQYQPILRDHICKDMSALVAARMRHIPLAPGSDWRDLPNIEVRLSDGTMARKL
RYTHHDRKNGRSSSGALRGVCSVCVEAGKACDPAARQFN TLIPWCLPHTGNRHNHWAGLYGRLEWDGFFSTTVTNP
EPMGKQGRVLHPEQHRVSVRECAR SQGFPD TYR LFGNILDKHRQVGN AVPPPLAKAIGLEIKLCMLAKARESASA
KIKEEEAAKD

```

Predicted unstructured regions list on AlphaFold model missing in PDB structure of DNMT1 : 1-19; 93-347 ; 389-399 ; 603-614 ; 639-648 ; 952-959 ; 978-984 ; 1106-1134

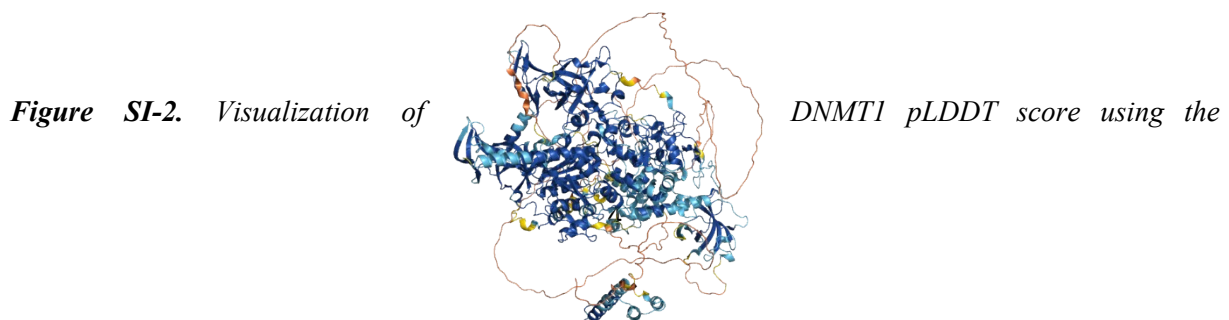

adapted plugin obtained from the following URL: <https://github.com/APAJanssen/Alphafold2import>.

**Figure SI-3.** Details of USP7 AF (UniProt: AF-Q9009-F1, 1-1102) model highlighting in purple area the identified interacting region with DNMT1 (740-765) as previously reported (Xu et al., 2015). The extended region 656-791 represented in orange and purple was used to construct the complex model with identified DNMT1 interaction.

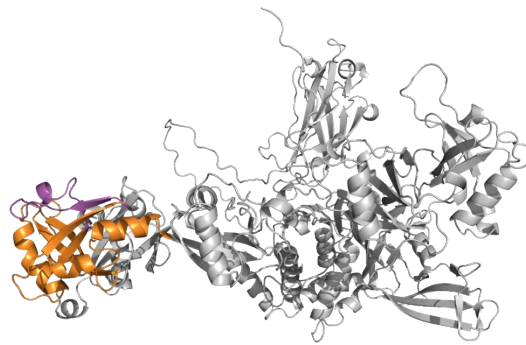

**Figure SI-4.** Prediction of USP7(676-793) / DNMT1(1102-1137) complex using ColabFold.

**A.** Heat map representing Multiple Sequence Alignment (MSA) using MMseq. The sequence coverage is shown along the Y-axis indicating the number of sequences under study. The X-axis represents amino acid positions. The color gradient from blue to red signifies the identity score of each studied sequence, where blue represents the highest identity scores (1.0) and red indicates the lowest identity scores (0.0). Each color line represents one sequence from MSA. **B.** pLDDT scores for each position across a protein sequence, as determined by five predictive models (Rank 1 to 5). The Y-axis quantifies the predicted IDDT score, and the X-axis displays the sequence positions. The black line represents the limit between both protein sequences.

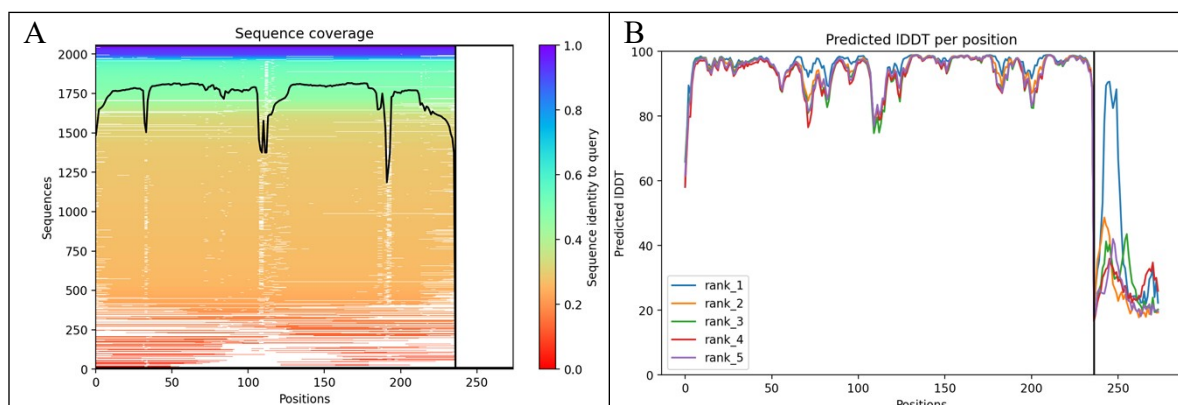

**Figure SI-5.** Prediction of USP7(676-793) / DNMT1(20-95; 349-1600) complex using ColabFold.

**A.** Heat map representing Multiple Sequence Alignment (MSA) using MMseq. The sequence coverage is shown along the Y-axis indicating the number of sequences under study. The X-axis represents amino acid positions. The color gradient from blue to red signifies the identity score of each studied sequence, where blue represents the highest identity scores (1.0) and red indicates the lowest identity scores (0.0). Each color line represents one sequence from MSA. **B.** pLDDT scores for each position across a protein sequence, as determined by five predictive models (Rank 1 to 5). The Y-axis quantifies the predicted IDDT score, and the X-axis displays the sequence positions. The black line represents the limit between both protein sequences.

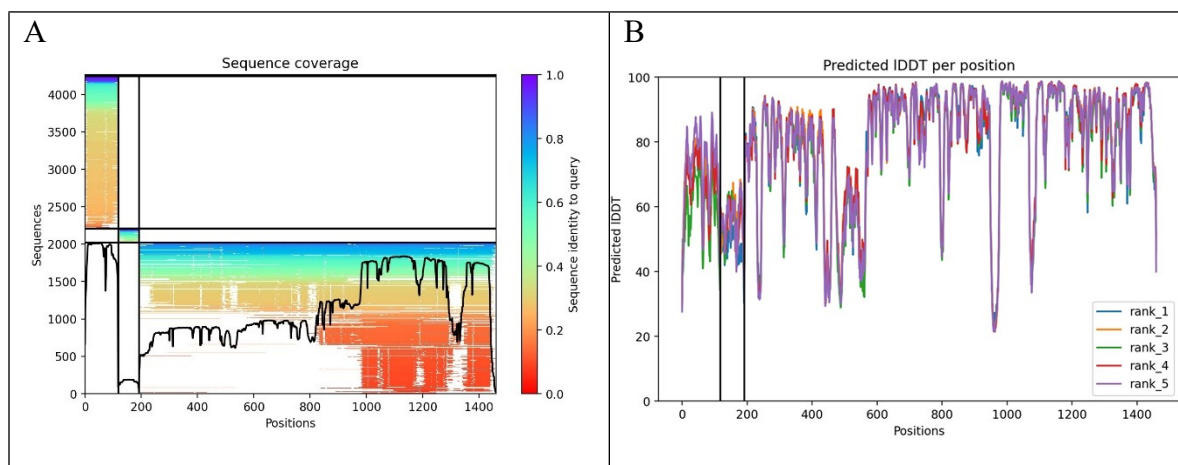

**Figure SI-6.** Details of UHRF1 AF (UniProt: AF-Q96T88-F1, 1-793) model highlighting in purple area the identified interacting region with DNMT1 (435-586) as previously reported (Achour et al., 2008). The extended region represented in cyan and purple was used to construct the complex model with identified DNMT1 interaction.

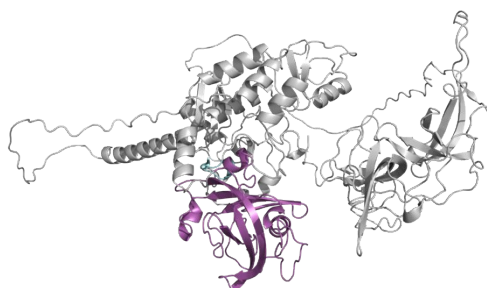

**Figure SI-7.** Prediction of UHRF1(426-586) / DNMT1(375-594) complex using ColabFold.

**A.** Heat map representing Multiple Sequence Alignment (MSA) using MMseq. The sequence coverage is shown along the Y-axis indicating the number of sequences under study. The X-axis represents amino acid positions. The color gradient from blue to red signifies the identity score of each studied sequence, where blue represents the highest identity scores (1.0) and red indicates the lowest identity scores (0.0). Each color line represents one sequence from MSA.

**B.** pLDDT scores for each position across a protein sequence, as determined by five predictive models (Rank 1 to 5). The Y-axis quantifies the predicted IDDT score, and the X-axis displays the sequence positions. The black line represents the limit between both protein sequences.

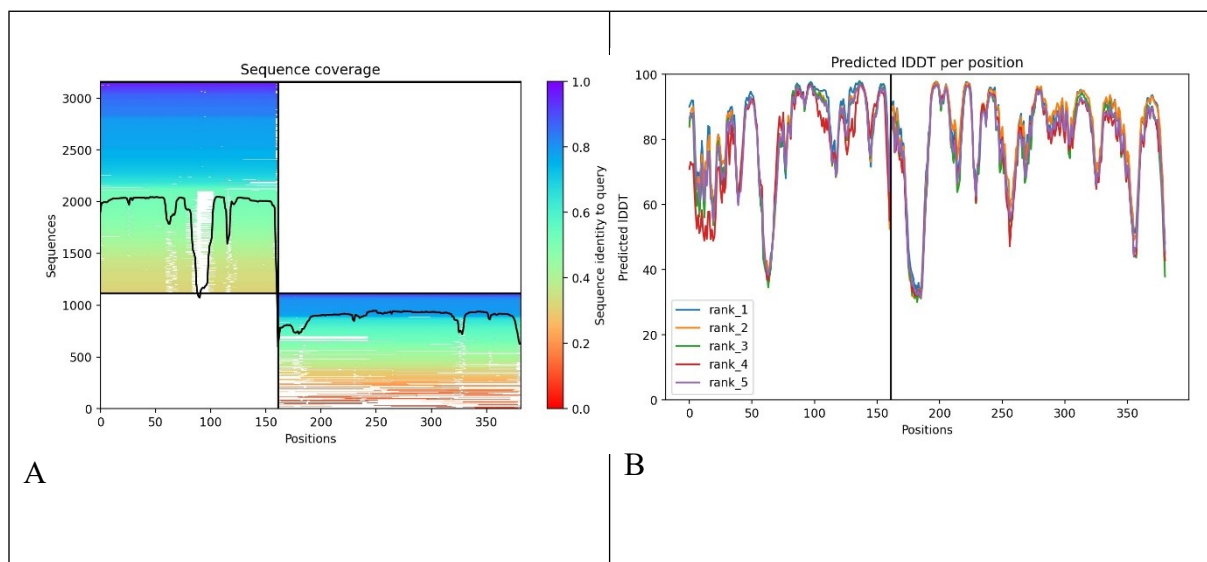

**Figure SI-8.** Details of Sp1 AF (UniProt, AF-P08047-F1,1-785) model highlighting in purple area the identified interacting region with DNMT1 (56-67) as previously reported (Estève et al., 2006). The extended region 54-70 represented in forest green and purple was used to construct the complex model with identified DNMT1 interaction.

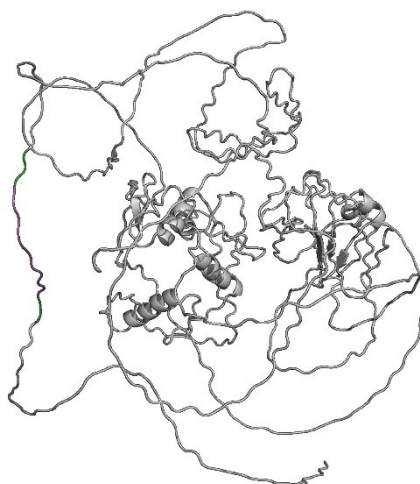

**Figure SI-9.** Prediction of Sp1(54-70) / DNMT1(730-907) complex using ColabFold.

**A.** Heat map representing Multiple Sequence Alignment (MSA) using MMseq. The sequence coverage is shown along the Y-axis indicating the number of sequences under study. The X-axis represents amino acid positions. The color gradient from blue to red signifies the identity score of each studied sequence, where blue represents the highest identity scores (1.0) and red indicates the lowest identity scores (0.0). Each color line represents one sequence from MSA.

**B.** pLDDT scores for each position across a protein sequence, as determined by five predictive models (Rank 1 to 5). The Y-axis quantifies the predicted IDDT score, and the X-axis displays the sequence positions. The black line represents the limit between both protein sequences.

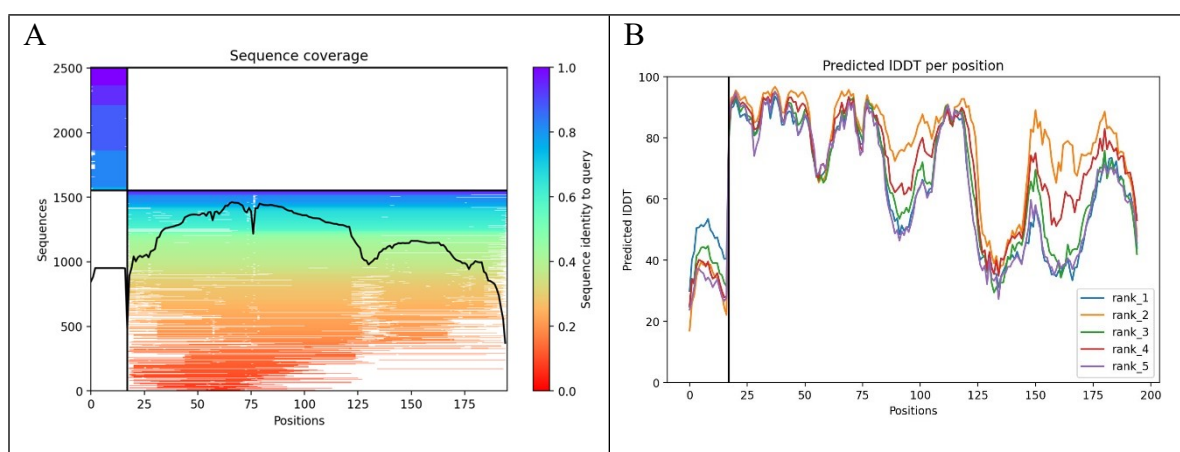

**Figure SI-10.** Details of CFP1 AF (UniProt, AF-Q9P0U4-F1,1-656) model highlighting in purple area the identified interacting region with DNMT1 (163-213) as previously reported (Hashimoto et al., 2010). The extended region 165-215 represented in salmon and purple was used to construct the complex model with identified DNMT1 interaction.

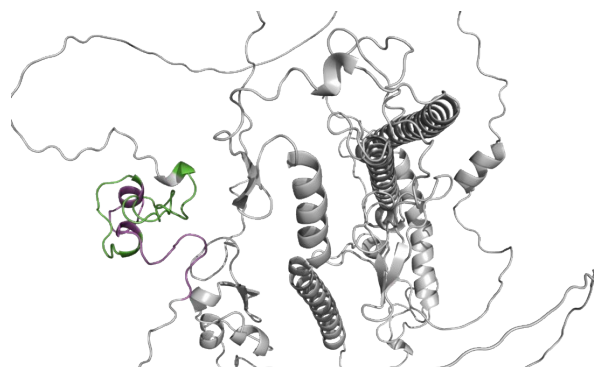

**Figure SI-11.** Prediction of CFP1(165-215) / DNMT1(349-1600) complex using ColabFold.

**A.** Heat map representing Multiple Sequence Alignment (MSA) using MMseq. The sequence coverage is shown along the Y-axis indicating the number of sequences under study. The X-axis represents amino acid positions. The color gradient from blue to red signifies the identity score of each studied sequence, where blue represents the highest identity scores (1.0) and red indicates the lowest identity scores (0.0). Each color line represents one sequence from MSA.

**B.** pLDDT scores for each position across a protein sequence, as determined by five predictive models (Rank 1 to 5). The Y-axis quantifies the predicted IDDT score, and the X-axis displays the sequence positions. The black line represents the limit between both protein sequences.

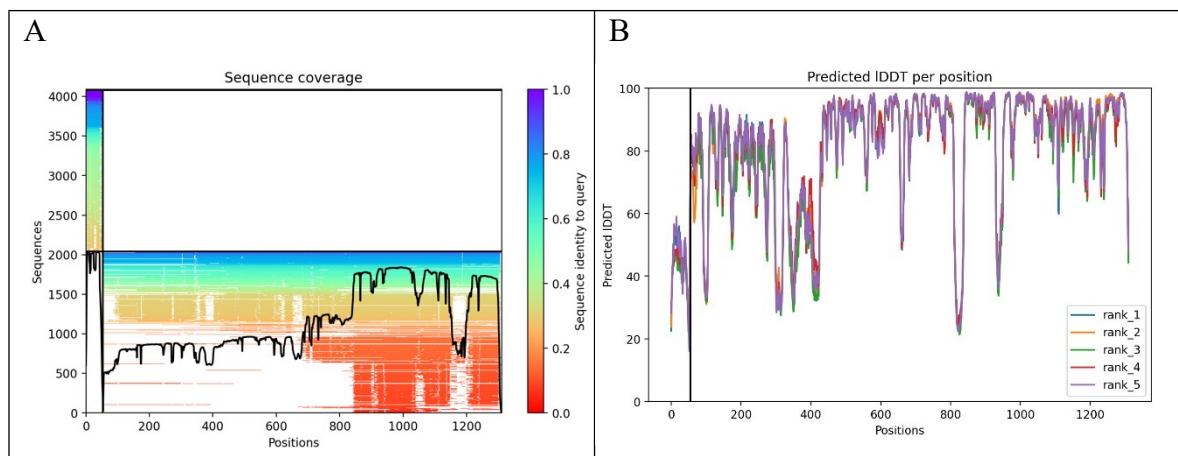

**Figure SI-12.** Details of Stat3 AF (UniProt:AF-P40763-F1, 1-770) model highlighting in purple area a peptide enables to disrupt the interaction with DNMT1 (677-693) as previously reported (Cheray et al., 2014).

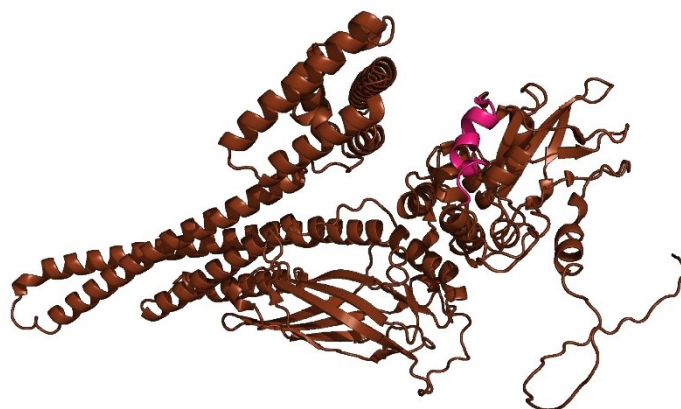

**Figure SI-13.** Prediction of Stat3 (498-770) / Stat3 (498-770) complex using ColabFold and relaxation mode for rank 1.

**A.** Heat map representing Multiple Sequence Alignment (MSA) using MMseq. The sequence coverage is shown along the Y-axis indicating the number of sequences under study. The X-axis represents amino acid positions. The color gradient from blue to red signifies the identity score of each studied sequence, where blue represents the highest identity scores (1.0) and red indicates the lowest identity scores (0.0). Each color line represents one sequence from MSA.

**B.** pLDDT scores for each position across a protein sequence, as determined by five predictive models (Rank 1 to 5). The Y-axis quantifies the predicted IDDT score, and the X-axis displays the sequence positions. The black line represents the limit between both protein sequences.

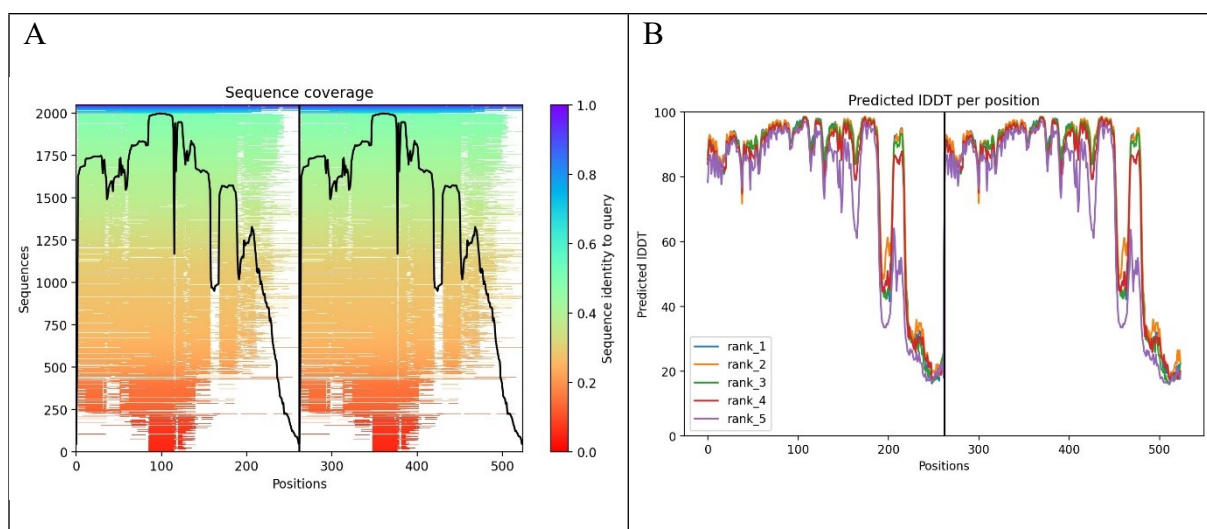

**Figure SI-14.** Dimeric complex of Stat3, in chocolate, predicted by AF2.

**A.** The model highlighting in hot pink area a peptide enables to disrupt the interaction with DNMT1 (677-693) as previously reported (Cheray *et al.*, 2014).

**B.** Focus on PPST2213 conformation. The stick representation highlights amino acids close to P<sup>678</sup> and P<sup>689</sup> likely to be involved in conformational changes due to K<sup>685</sup> acetylation, essential for DNMT1 interaction as previously reported (REF). The AF model was superimposed with X-Ray structure (PDB code: [1BG1](#)) and presents a RMSD of 2,06 Å.

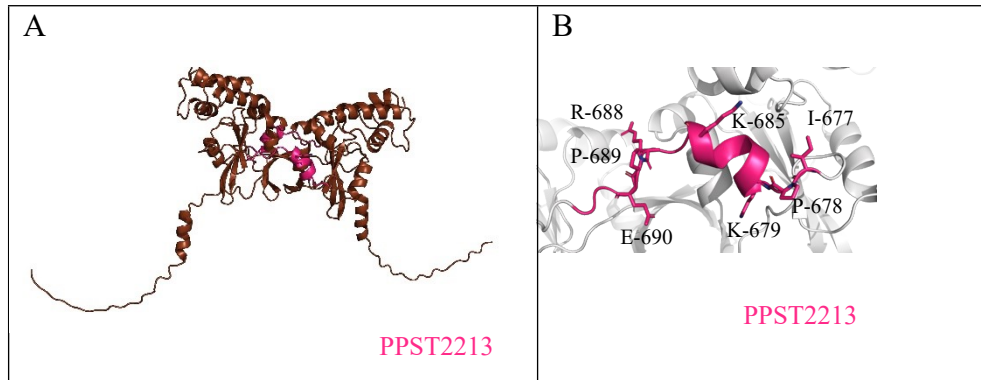

**Figure SI-15.** Prediction of Stat32(498-720) / DNMT1(349-1616) complex using ColabFold and relaxation mode for rank 1.

**A.** Heat map representing Multiple Sequence Alignment (MSA) using MMseq. The sequence coverage is shown along the Y-axis indicating the number of sequences under study. The X-axis represents amino acid positions. The color gradient from blue to red signifies the identity score of each studied sequence, where blue represents the highest identity scores (1.0) and red indicates the lowest identity scores (0.0). Each color line represents one sequence from MSA.

**B.** pLDDT scores for each position across a protein sequence, as determined by five predictive models (Rank 1 to 5). The Y-axis quantifies the predicted IDDT score, and the X-axis displays the sequence positions. The black line represents the limit between both protein sequences.

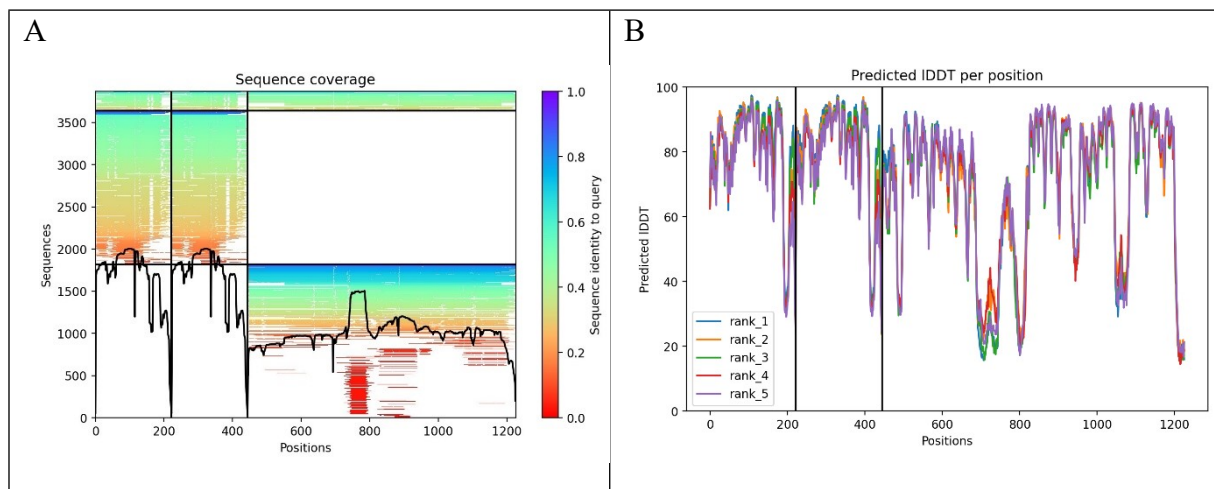

**Figure SI-16.** Details of DMAP1 AF (UniProtKB: AF-Q9NPF5-F1, 1-467) model highlighting in purple area the identified interacting region with DNMT1 (212-272) as previously reported (Rountree et al., 2010). The extended region 140-290 represented in green and purple was used to construct the complex model with identified DNMT1 interaction.

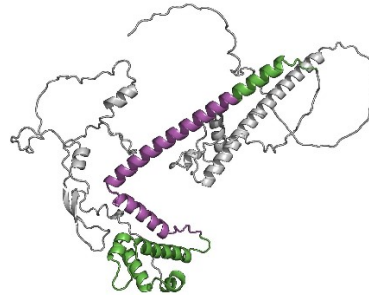

**Figure SI-17.** Prediction of DNMT1(20-95) / DMAP1(140-290) complex using ColabFold.

**A.** Heat map representing Multiple Sequence Alignment (MSA) using MMseq. The sequence coverage is shown along the Y-axis indicating the number of sequences under study. The X-axis represents amino acid positions. The color gradient from blue to red signifies the identity score of each studied sequence, where blue represents the highest identity scores (1.0) and red indicates the lowest identity scores (0.0). Each color line represents one sequence from MSA.

**B.** pLDDT scores for each position across a protein sequence, as determined by five predictive models (Rank 1 to 5). The Y-axis quantifies the predicted IDDT score, and the X-axis displays the sequence positions. The black line represents the limit between both protein sequences.

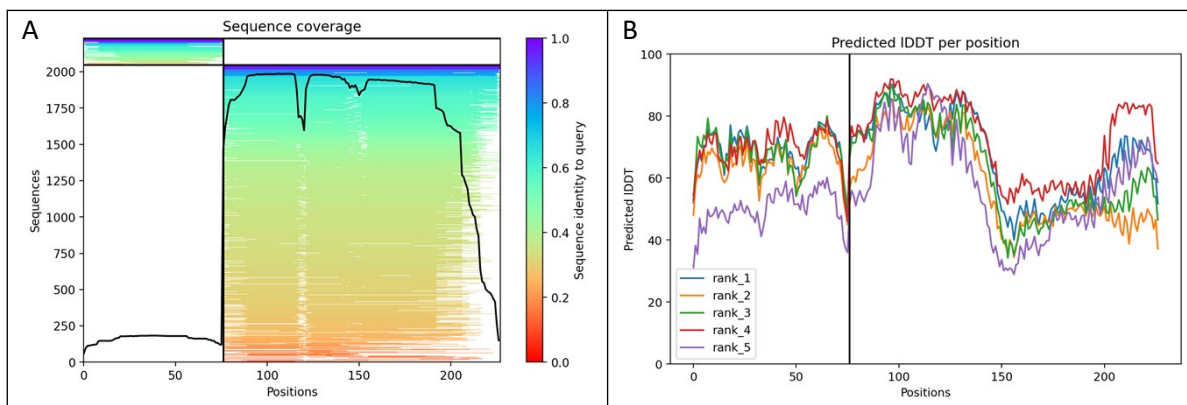

**Figure SI-18.** Computational identification of methylation specific site mediated by DNMT1/DMAP1.

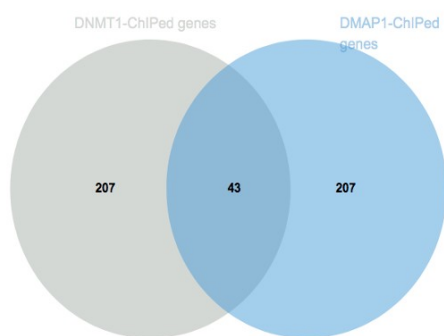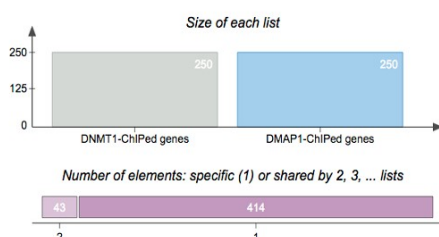

Click on a venn diagram figure to display the linked elements:

Common elements in DNMT1-ChIPed genes DMAP1-ChIPed genes :

MTRNR2L1  
 NPAS4  
 IQSEC3  
 XKR7  
 MTRNR2L2  
 MSH3  
 DHFR  
 INSM2  
 STX16  
 LRRC59  
 LIN28A  
 GTF3C3  
 CCDC88A  
 CDK5RAP1  
 MRPL44  
 TMEM248  
 DTD2  
 USPL1  
 HMGB1  
 IPO4  
 MTF2  
 STX18  
 SCFD1  
 RABGGTA  
 HDAC4  
 RANBP2  
 NDUFAF6  
 ESF1  
 NRL  
 DCAF11  
 AAR2  
 MFF  
 PRMT5  
 NME1-NME2  
 NME1  
 NOL7  
 NAT10  
 DDX1  
 RSPH3  
 RPS7  
 NCOA5  
 RPL5  
 SEC14L1

603.76, found m/z= 603.90,  $t_R = 2.52$  min.

Login | Register

Transcription **Pathways** Ontologies Diseases/Drugs Cell Types Misc Legacy Crowd

KEGG 2021 Human

Bar Graph Table Clustergram Appyter

Click the bars to sort. Now sorted by p-value ranking.

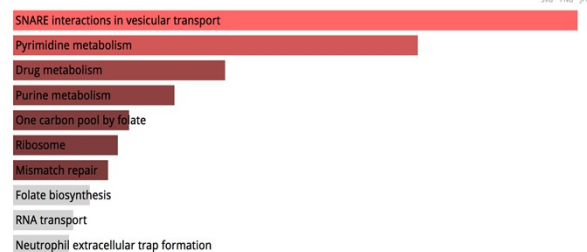

## II. Peptide characterisation

**PPUS2202** (-CONH<sub>2</sub>, USP7, 755-765, NH<sub>2</sub>-Ala<sup>1</sup>-Leu<sup>2</sup>-Asp<sup>3</sup>-Glu<sup>4</sup>-Leu<sup>5</sup>-Met<sup>6</sup>-Asp<sup>7</sup>-Asp<sup>8</sup>-Gly<sup>9</sup>-Asp<sup>10</sup>-Ile<sup>11</sup>-CONH<sub>2</sub>). **PPUS2202** was synthesised using general method B and purified *via* method A (28 mg, 23 %). **HPLC**:  $t_R = 3.65$  min, %<sub>X</sub> = 99 %; **HPLC-MS (APCI)**: calcd for [C<sub>49</sub>H<sub>79</sub>N<sub>11</sub>O<sub>22</sub>S +H]<sup>+</sup> m/z= 1205.51, found m/z= 1206.30, calcd for [M+2H]<sup>2+</sup> m/z=

**PPUS2212** (-CONH<sub>2</sub>, USP7, 735-745, NH<sub>2</sub>-Tyr<sup>1</sup>-Glu<sup>2</sup>-Glu<sup>3</sup>-Val<sup>4</sup>-Lys(Alloc)<sup>5</sup>-Pro<sup>6</sup>-Asn<sup>7</sup>-Leu<sup>8</sup>-Thr<sup>9</sup>-Glu<sup>10</sup>-Arg<sup>11</sup>-CONH<sub>2</sub>) **PPUS2212** was synthesised using general method A and purified *via* method A (90 mg, 62 %). **HPLC**: t<sub>R</sub> = 3.53 min; %<sub>X</sub> = 99 %; **HPLC-MS (APCI)**: calcd for [C<sub>64</sub>H<sub>101</sub>N<sub>17</sub>O<sub>22</sub>+H]<sup>+</sup> m/z=1460.74, found m/z= 1461.10, calcd for [C<sub>64</sub>H<sub>101</sub>N<sub>17</sub>O<sub>22</sub>+2H]<sup>2+</sup> m/z= 730.87, found m/z= 731.45, t<sub>R</sub> = 2.23 min.

**PPUH2206** (-CONH<sub>2</sub>, UHRF1, 734-741, NH<sub>2</sub>-Pro<sup>1</sup>-Val<sup>2</sup>-Arg<sup>3</sup>-Val<sup>4</sup>-Val<sup>5</sup>-Arg<sup>6</sup>-Asn<sup>7</sup>-Val<sup>8</sup>-CONH<sub>2</sub>). **PPUH2206** was synthesised using general method A and purified *via* method A (87 mg, 75 %). **HPLC**: t<sub>R</sub> = 2.99 min, %<sub>X</sub> = 75 %; **HPLC-MS (APCI)**: calcd for [C<sub>41</sub>H<sub>76</sub>N<sub>16</sub>O<sub>9</sub>+H]<sup>+</sup> m/z= 937.61, found m/z= 937.50, calcd for [C<sub>41</sub>H<sub>76</sub>N<sub>16</sub>O<sub>9</sub>+2H]<sup>2+</sup> m/z= 469.30, found m/z= 469.50, t<sub>R</sub> = 1.51 min.

**PPSP2201** (-CONH<sub>2</sub>, Sp1, 56-67, NH<sub>2</sub>-Ser<sup>1</sup>-Gln<sup>2</sup>-Pro<sup>3</sup>-Ser<sup>4</sup>-Pro<sup>5</sup>-Ala<sup>6</sup>-Leu<sup>7</sup>-Leu<sup>8</sup>-Ala<sup>9</sup>-Ala<sup>10</sup>-Thr<sup>11</sup>-CONH<sub>2</sub>). **PPSP2201** was synthesised using general method A and purified *via* method A (90 mg, 77%). **HPLC**: t<sub>R</sub> = 3.95 min, %<sub>X</sub> = 99 %; **HPLC-MS (APCI)**: calcd for [C<sub>52</sub>H<sub>90</sub>N<sub>14</sub>O<sub>16</sub>+H]<sup>+</sup> m/z= 1167.67, found m/z= 1167.45, calcd for [C<sub>52</sub>H<sub>90</sub>N<sub>14</sub>O<sub>16</sub>+2H]<sup>2+</sup> m/z= 584.34, found m/z= 584.55, t<sub>R</sub> = 2.69 min.

**PPCF2209** (-CONH<sub>2</sub>, CFP1, 205-215, NH<sub>2</sub>-Leu<sup>1</sup>-Arg<sup>2</sup>-Gln<sup>3</sup>-Cys<sup>4</sup>-Gln<sup>5</sup>-Leu<sup>6</sup>-Arg<sup>7</sup>-Ala<sup>8</sup>-Arg<sup>9</sup>-Glu<sup>10</sup>-Ser<sup>11</sup>-CONH<sub>2</sub>). **PPCF2209** was synthesised using general method A and purified *via* method B (9 mg, 10 %). **HPLC** t<sub>R</sub> = 2.99 min, %<sub>X</sub> = 95 %; **HPLC-MS (APCI)**: calcd for [C<sub>54</sub>H<sub>99</sub>N<sub>23</sub>O<sub>16</sub>S+H]<sup>+</sup> m/z= 1358.94, found m/z= 1358.80, [C<sub>54</sub>H<sub>99</sub>N<sub>23</sub>O<sub>16</sub>S +2H]<sup>2+</sup> m/z= 679.87, found m/z= 680.35, t<sub>R</sub> = 1.4 min.

**PPCF2214** (-CONH<sub>2</sub>, CFP1, 195-205, NH<sub>2</sub>-Gly<sup>1</sup>-Pro<sup>2</sup>-Asn<sup>3</sup>-Lys<sup>4</sup>-Ile<sup>5</sup>-Arg<sup>6</sup>-Gn<sup>7</sup>-Lys<sup>8</sup>-Cys<sup>9</sup>-Arg<sup>10</sup>-Leu<sup>11</sup>-CONH<sub>2</sub>). **PPCF2214** was synthesised using general method A and purified *via* method A (18 mg, 13 %). **HPLC** t<sub>R</sub> = 3.96 min, %<sub>X</sub> = 95 %; **HPLC-MS (APCI)**: calcd for [C<sub>63</sub>H<sub>110</sub>N<sub>22</sub>O<sub>17</sub>S +2H]<sup>2+</sup> m/z= 740.41, found m/z= 740.95, calcd for [C<sub>63</sub>H<sub>110</sub>N<sub>22</sub>O<sub>17</sub>S +3H]<sup>3+</sup> m/z= 493.94 found m/z= 494.30, t<sub>R</sub> = 2.42 min.

**PPSt2213** (-CONH<sub>2</sub>, Stat3, 677-693, NH<sub>2</sub>-Ile<sup>1</sup>-Pro<sup>2</sup>-Lys(Alloc)<sup>3</sup>-Glu<sup>4</sup>-Glu<sup>5</sup>-Ala<sup>6</sup>-Phe<sup>7</sup>-Gly<sup>8</sup>-Lys(Alloc)<sup>9</sup>-Tyr<sup>10</sup>-Cys<sup>11</sup>-Arg<sup>12</sup>-Pro<sup>13</sup>-Glu<sup>14</sup>-Ser<sup>15</sup>-Gln<sup>16</sup>-Glu<sup>17</sup>-CONH<sub>2</sub>). **PPSt2213** was synthesised using general method A and purified *via* method A (28 mg, 10 %). **HPLC-MS (APCI)**: calcd for [C<sub>96</sub>H<sub>144</sub>N<sub>24</sub>O<sub>32</sub>S+2H]<sup>2+</sup> m/z= 1089.51, found m/z= 1090.25, calcd for [C<sub>96</sub>H<sub>144</sub>N<sub>24</sub>O<sub>32</sub>S+3H]<sup>3+</sup> m/z= 726.67, found m/z= 727.05, t<sub>R</sub> = 2.63 min; **HPLC** t<sub>R</sub> = 3.92 min, %<sub>X</sub> = 99 %.

**PPDM2203** (-CONH<sub>2</sub>, DMAP1, 235-245, NH<sub>2</sub>-Asn<sup>1</sup>-Arg<sup>2</sup>-Thr<sup>3</sup>-Pro<sup>4</sup>-Glu<sup>5</sup>-Gln<sup>6</sup>-Val<sup>7</sup>-Ala<sup>8</sup>-Glu<sup>9</sup>-Glu<sup>10</sup>-Glu<sup>11</sup>-CONH<sub>2</sub>). **PPDM2203** was synthesised using general method A and purified *via* method A (53 mg, 41 %). **HPLC**: t<sub>R</sub> = 2.96 min, %<sub>X</sub> = 95 %; **HPLC-MS (APCI)**: calcd for [C<sub>52</sub>H<sub>84</sub>N<sub>16</sub>O<sub>23</sub>+H]<sup>+</sup> m/z= 1301.60, found m/z= 1301.80, calcd for [C<sub>52</sub>H<sub>84</sub>N<sub>16</sub>O<sub>23</sub>+2H]<sup>2+</sup> m/z= 651.30, found m/z= 651.85, t<sub>R</sub> = 1.69 min.

**PPDM2211** (-COOH, DMAP1, 235-245, NH<sub>2</sub>-Asn<sup>1</sup>-Arg<sup>2</sup>-Thr<sup>3</sup>-Pro<sup>4</sup>-Glu<sup>5</sup>-Gln<sup>6</sup>-Val<sup>7</sup>-Ala<sup>8</sup>-Glu<sup>9</sup>-Glu<sup>10</sup>-Glu<sup>11</sup>-COOH). **PPDM2211** was synthesised using general method B and purified *via* method A (17 mg, 15 %). **HPLC**:  $t_R = 2.99$  min, %<sub>X</sub> = 99 %; **HPLC-MS (APCI)**: calcd for [C<sub>52</sub>H<sub>85</sub>N<sub>17</sub>O<sub>22</sub>+H]<sup>+</sup> m/z= 1300.61, found m/z= 1301.25, calcd for [C<sub>52</sub>H<sub>85</sub>N<sub>17</sub>O<sub>22</sub>+2H]<sup>2+</sup> m/z= 650.81, found m/z= 651.40,  $t_R = 1.72$  min.

**PPDM2215** (-CONH<sub>2</sub>, DMAP1, 255-265, NH<sub>2</sub>-Glu<sup>1</sup>-Ala<sup>2</sup>-Arg<sup>3</sup>-Lys<sup>4</sup>-Lys<sup>5</sup>-Glu<sup>6</sup>-Arg<sup>7</sup>-Glu<sup>8</sup>-Lys<sup>9</sup>-Arg<sup>10</sup>-Ser<sup>11</sup>-CONH<sub>2</sub>). **PPDM2215** was synthesised using general method A and purified *via* method B (43 mg, 26 %). **HPLC**:  $t_R = 3.48$  min, %<sub>X</sub> = 96 %; **HPLC-MS (APCI)**: calcd for [C<sub>69</sub>H<sub>118</sub>N<sub>24</sub>O<sub>24</sub>+H]<sup>+</sup> m/z= 1168.88, found m/z= 1669.50, calcd for [C<sub>69</sub>H<sub>119</sub>N<sub>24</sub>O<sub>24</sub>+2H]<sup>2+</sup> m/z= 834.45, found m/z= 834.50,  $t_R = 1.93$  min.

### III. Peptide Spectra

Figure SI-19. PPUS2202 peptide spectra

#### LC-MS analysis

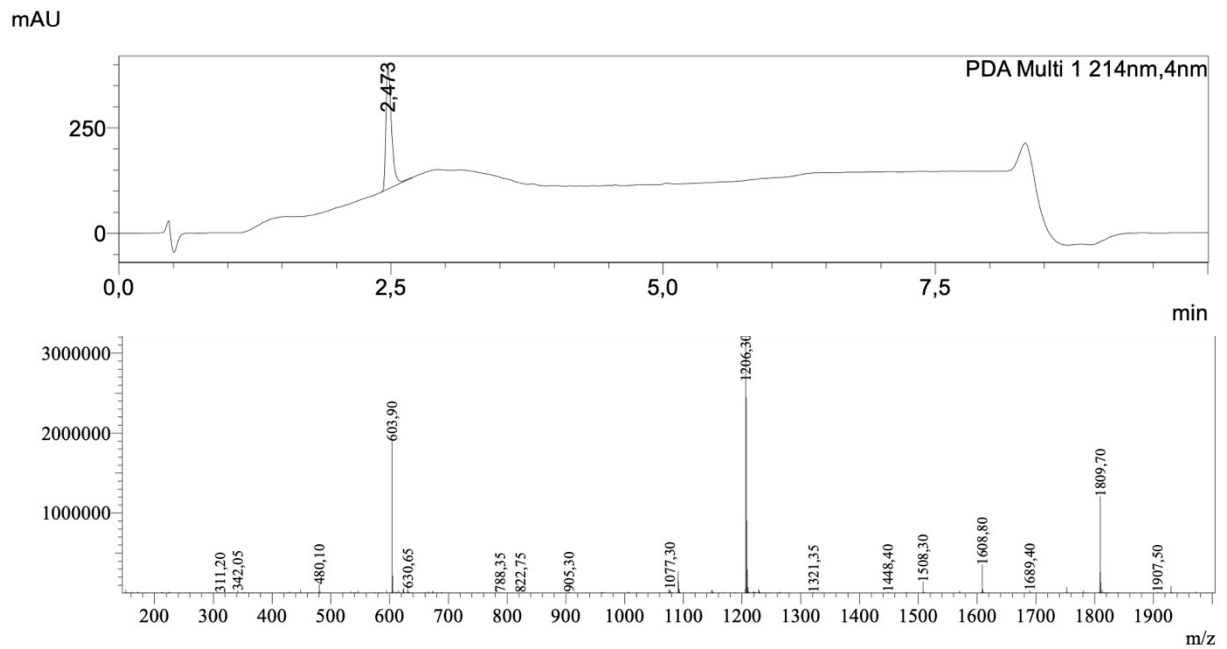

#### HPLC analysis

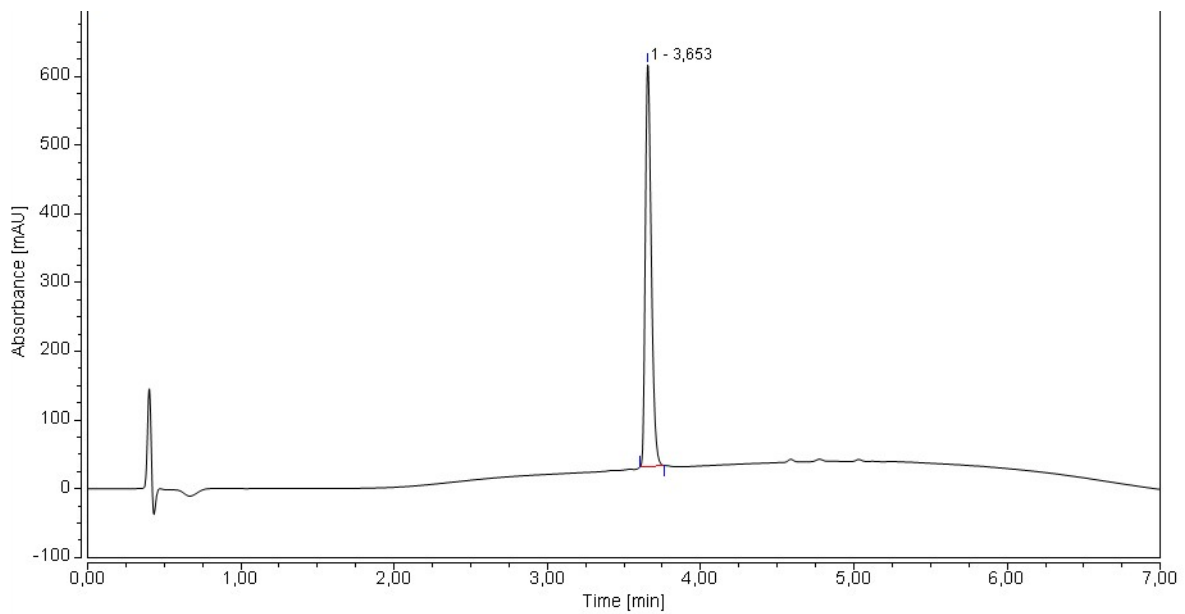

Figure SI-20. PPUS2212 peptide spectra

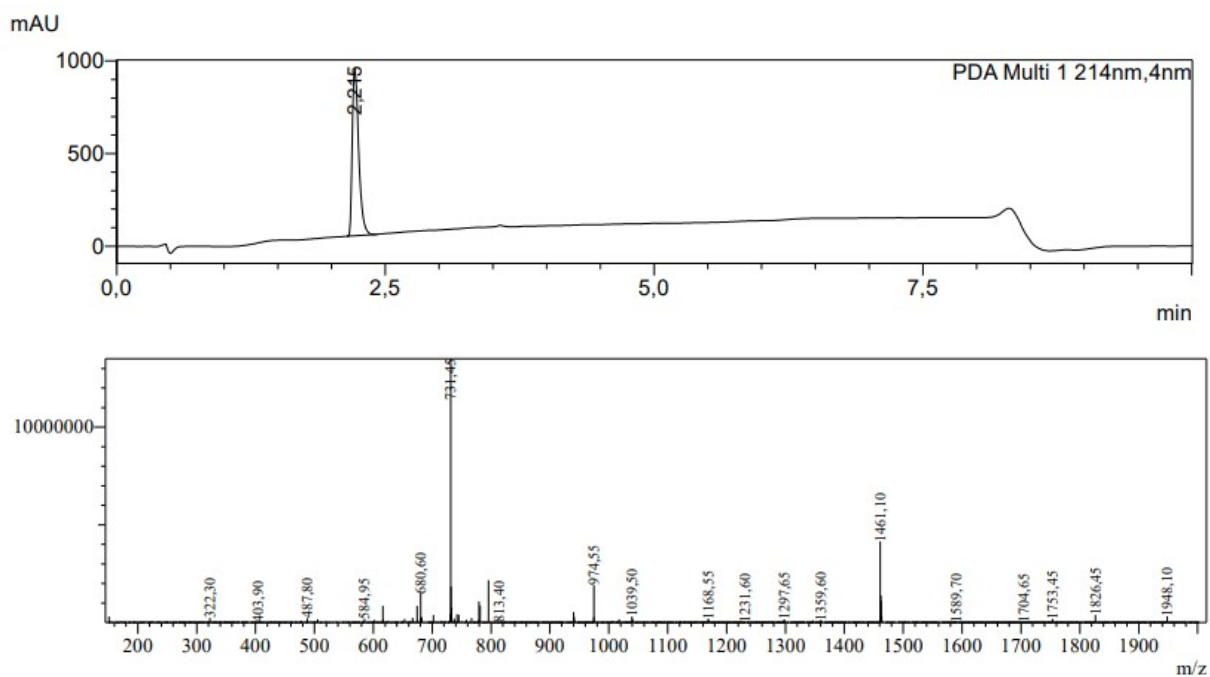

LC-MS analysis

HPLC analysis

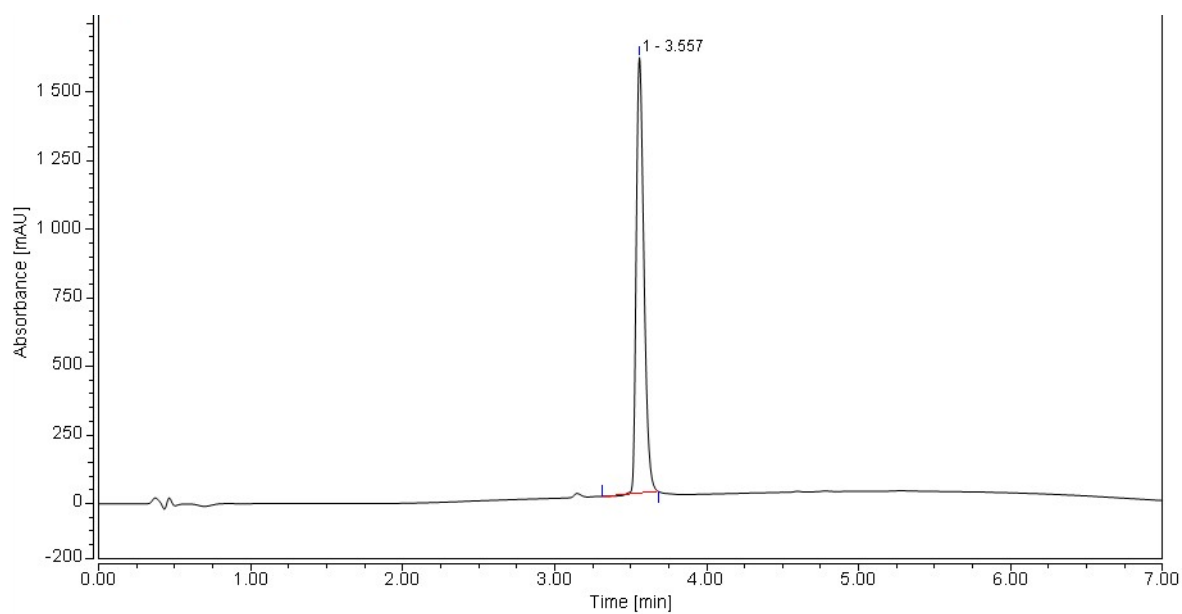

Figure SI-21. PPUH2206 peptide spectra

LCMS analysis

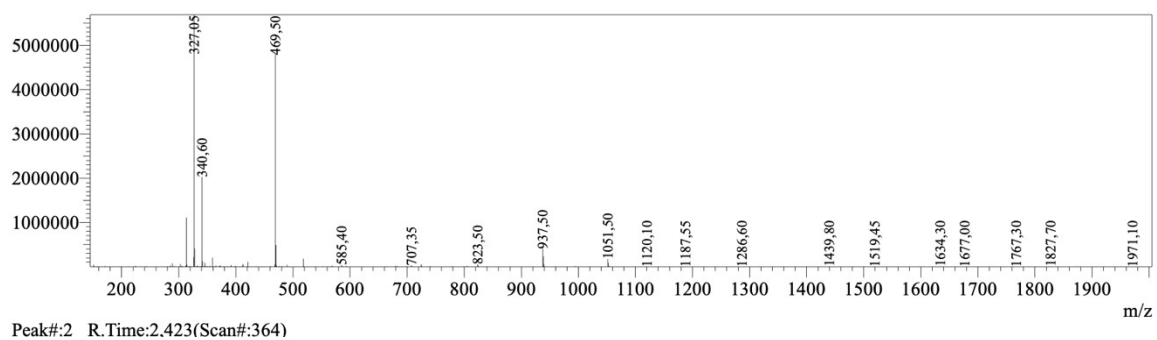

HPLC analysis

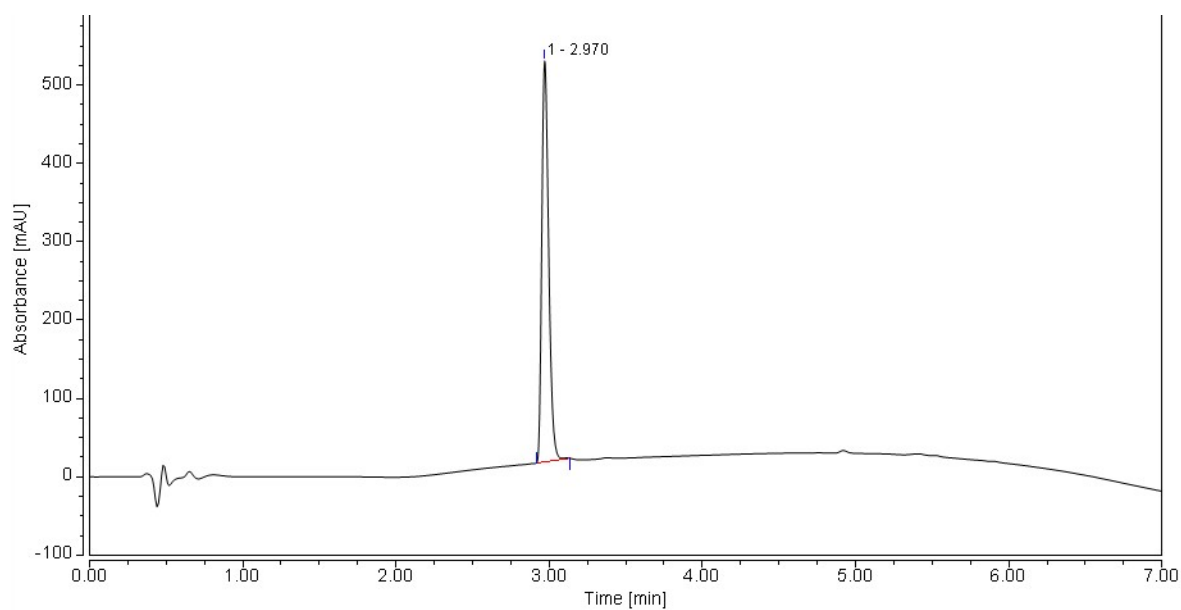

Figure SI-22. PPSP2201 peptide spectra

LCMS analysis

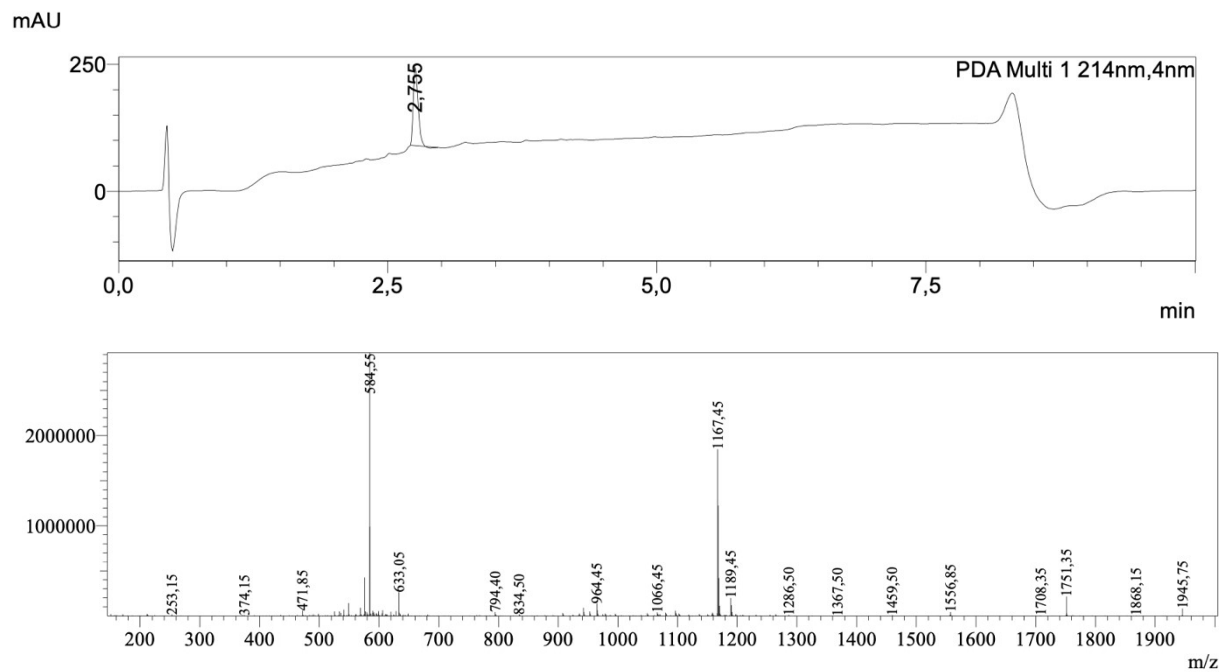

HPLC analysis

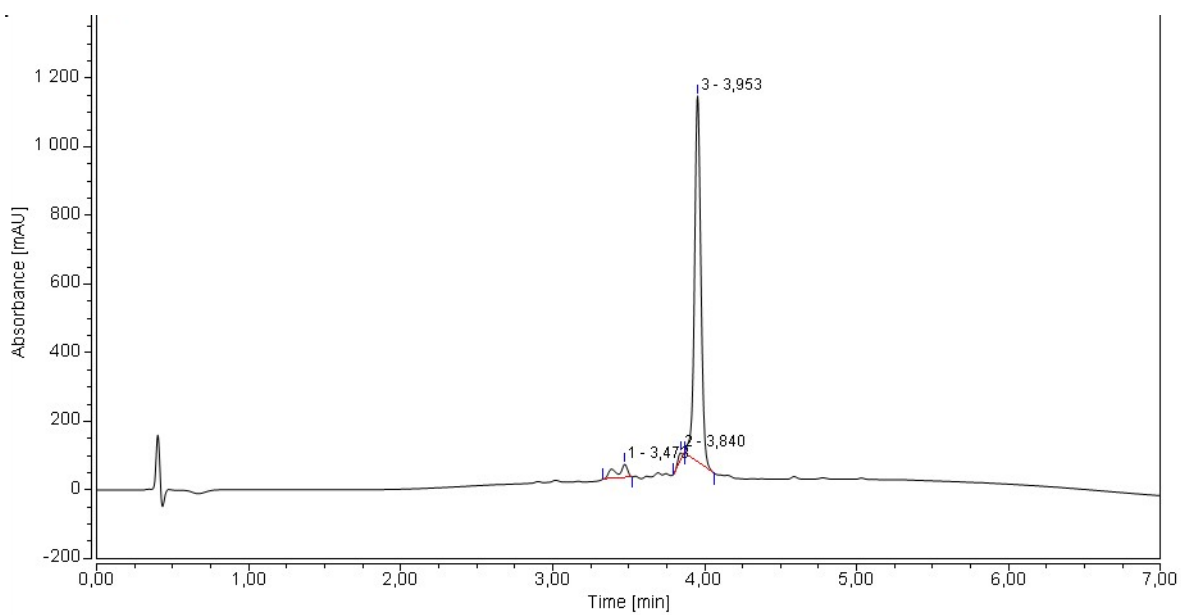

Figure SI-23. PPCF2209 peptide spectra

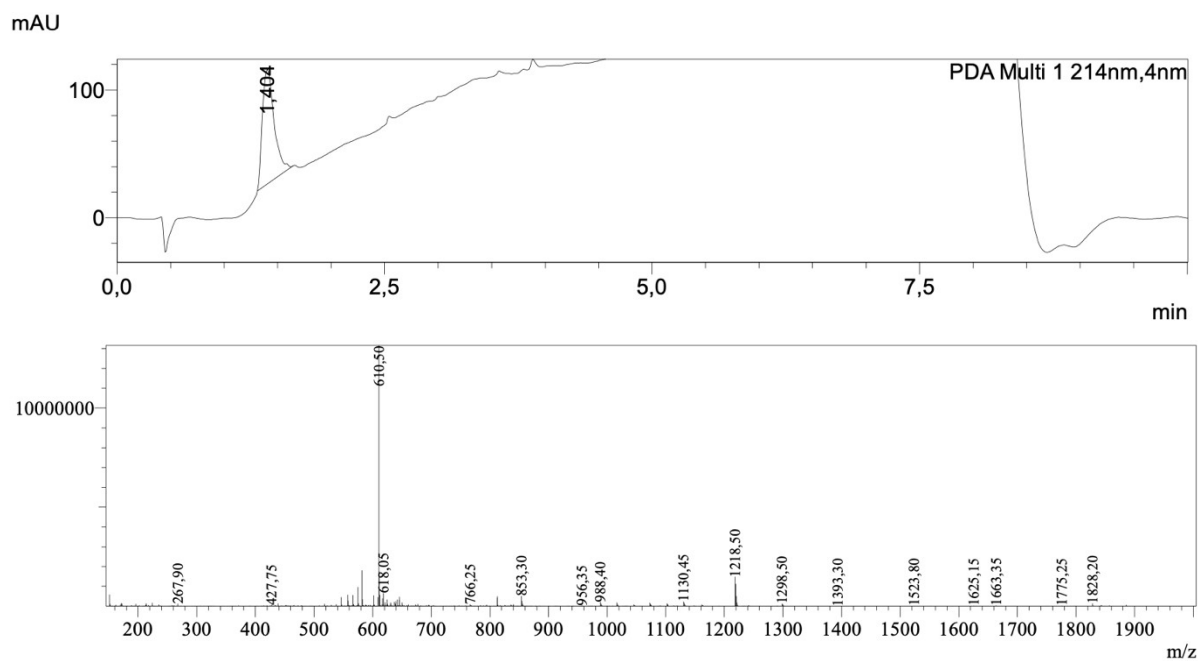

LCMS analysis

HPLC analysis

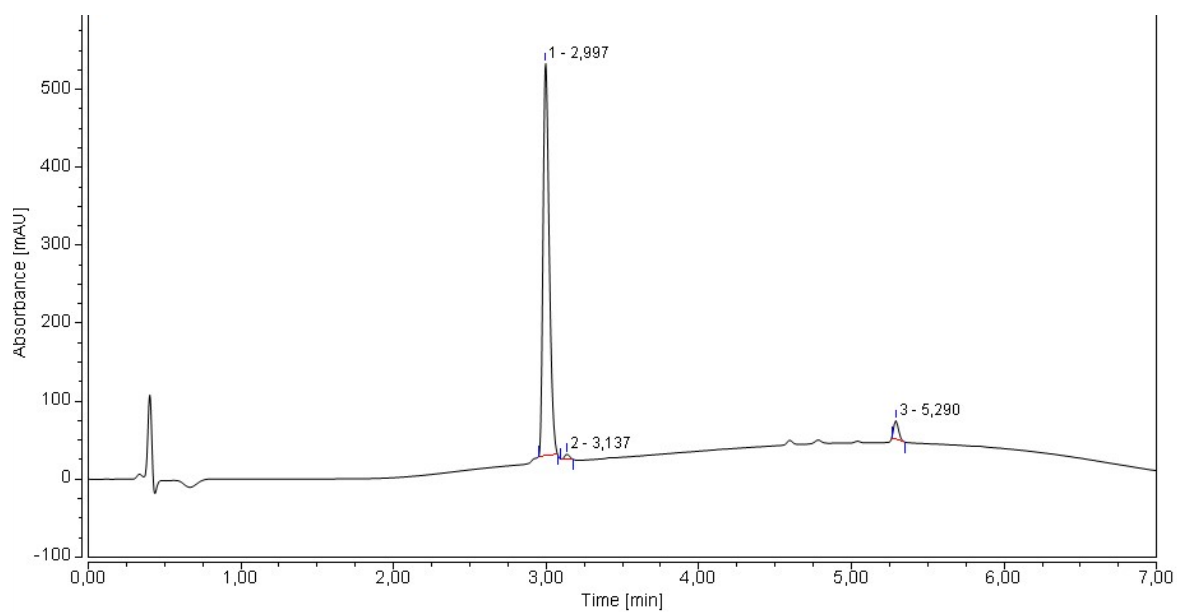

Figure SI-24. PPCF2214 peptide spectra

LCMS analysis

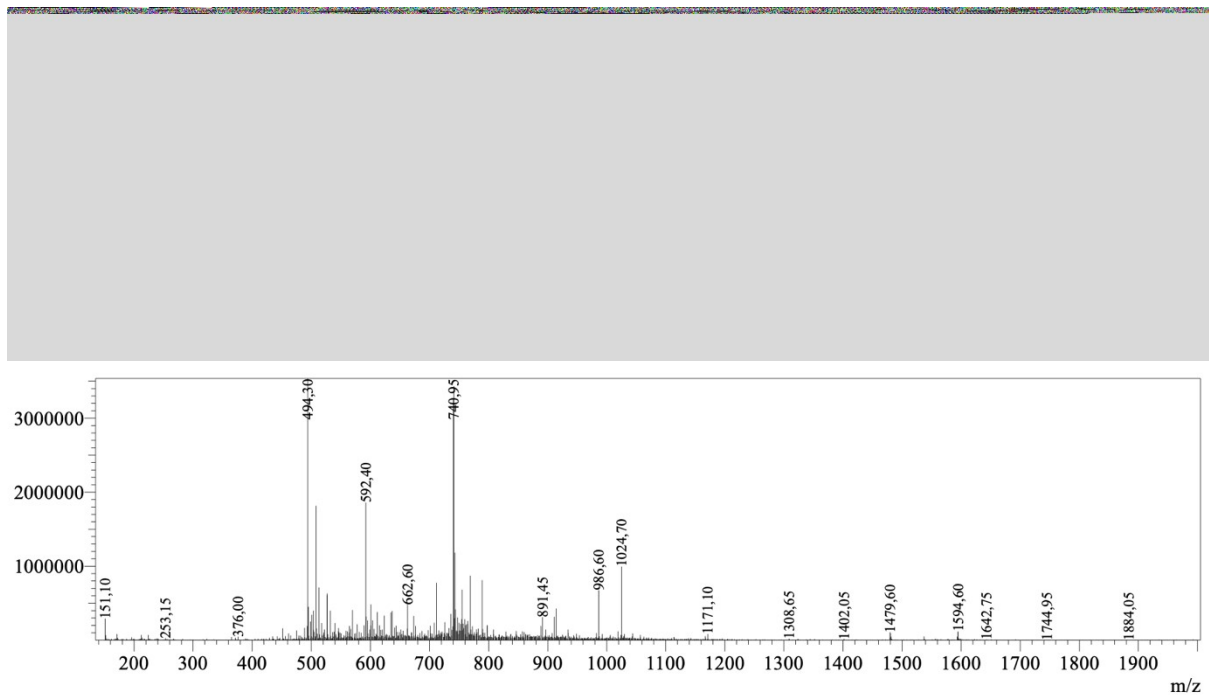

HPLC analysis

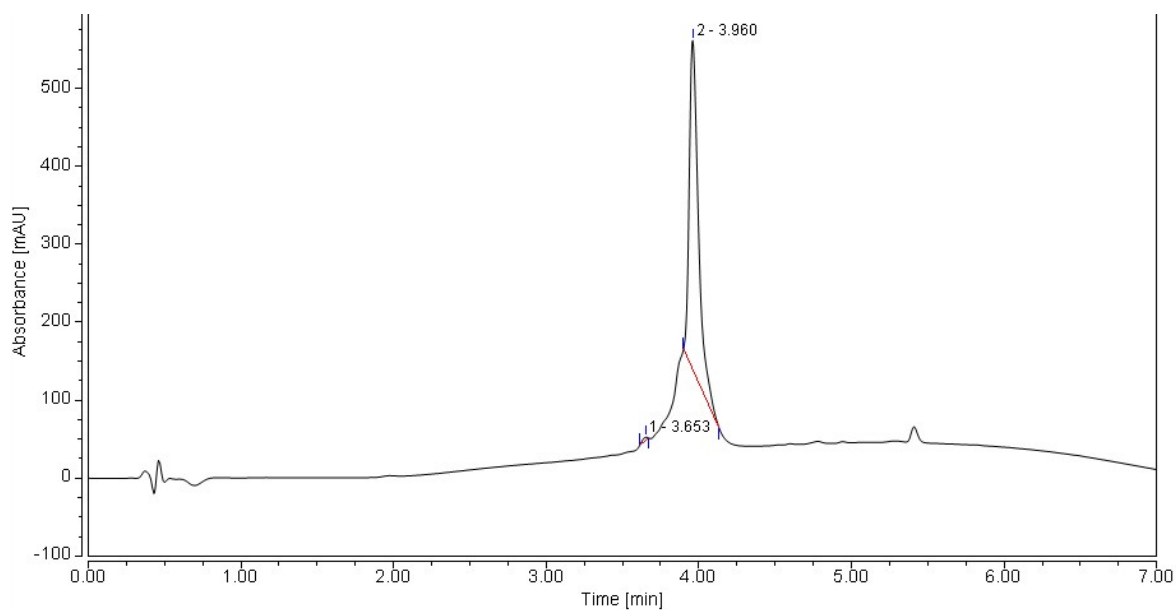



Figure SI-25. PPS<sub>t</sub>2213 peptide spectra

LCMS analysis

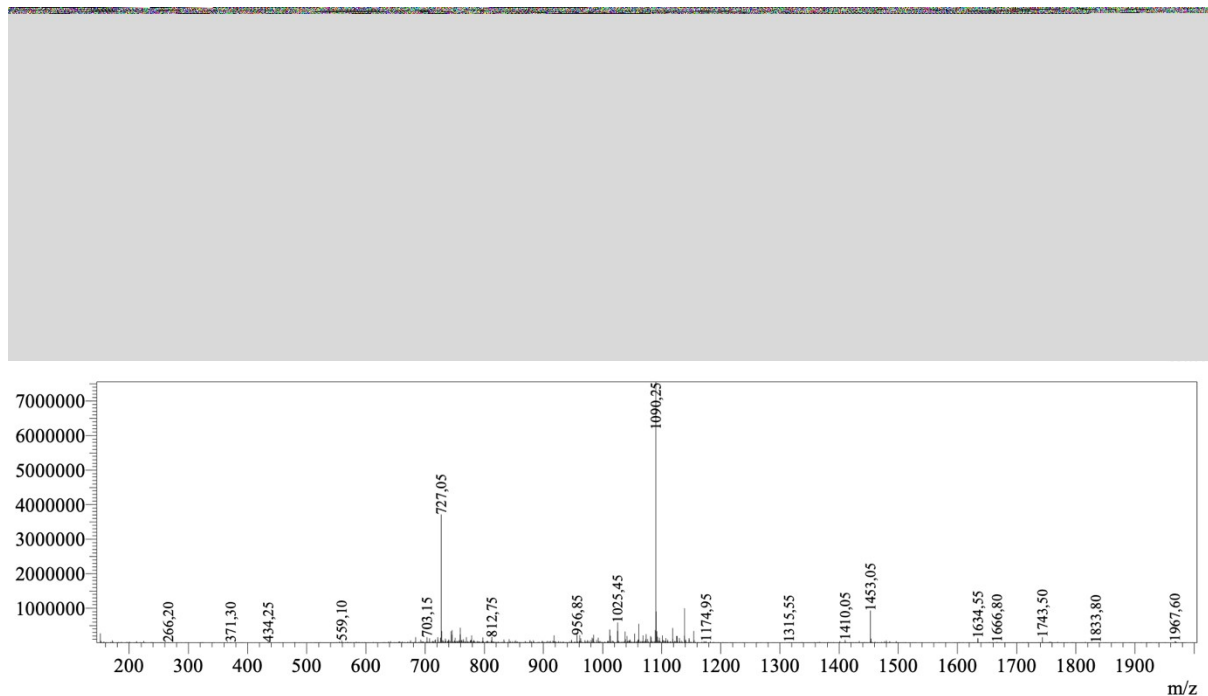

HPLC analysis

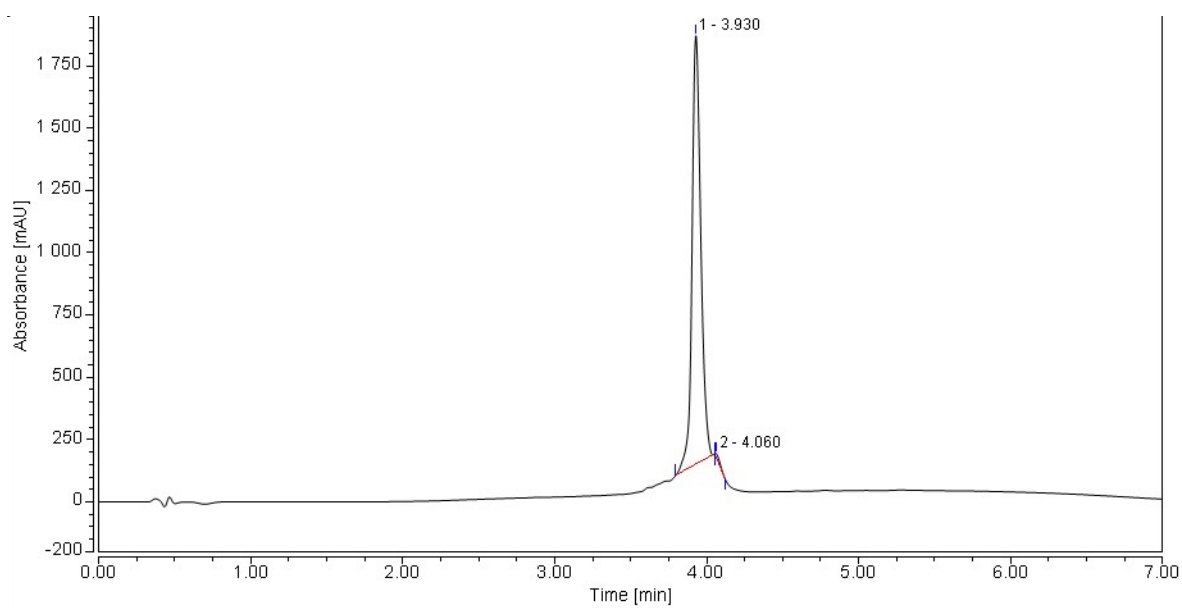



Figure SI-26. PPDM2203 peptide spectra

LCMS analysis

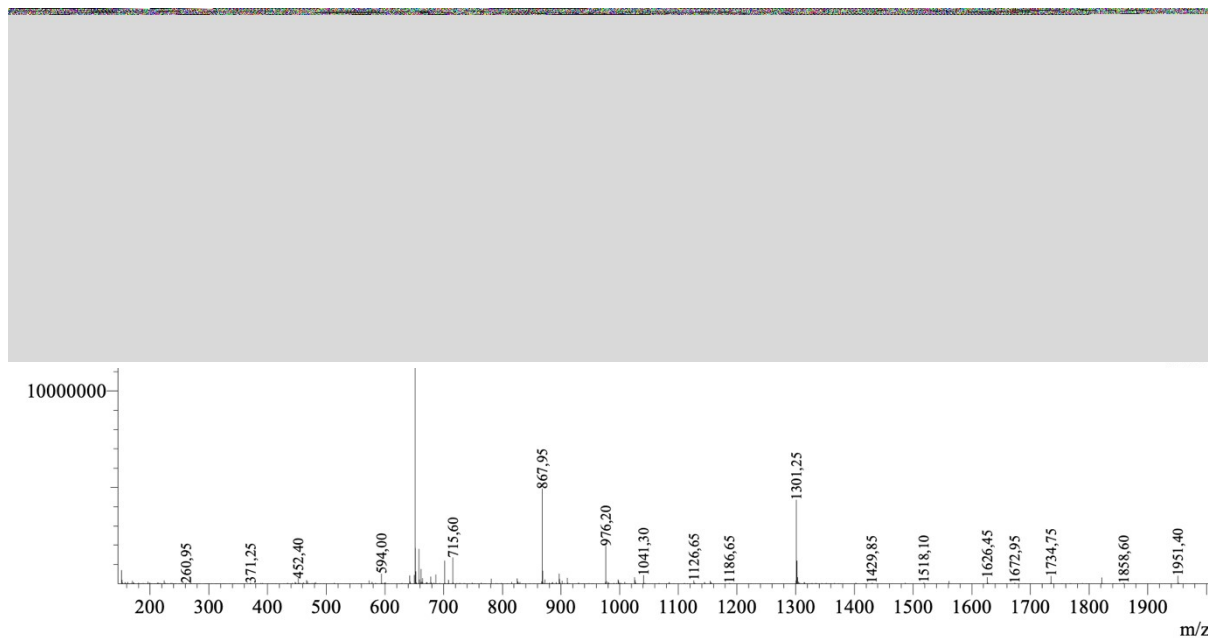

HPLC analysis

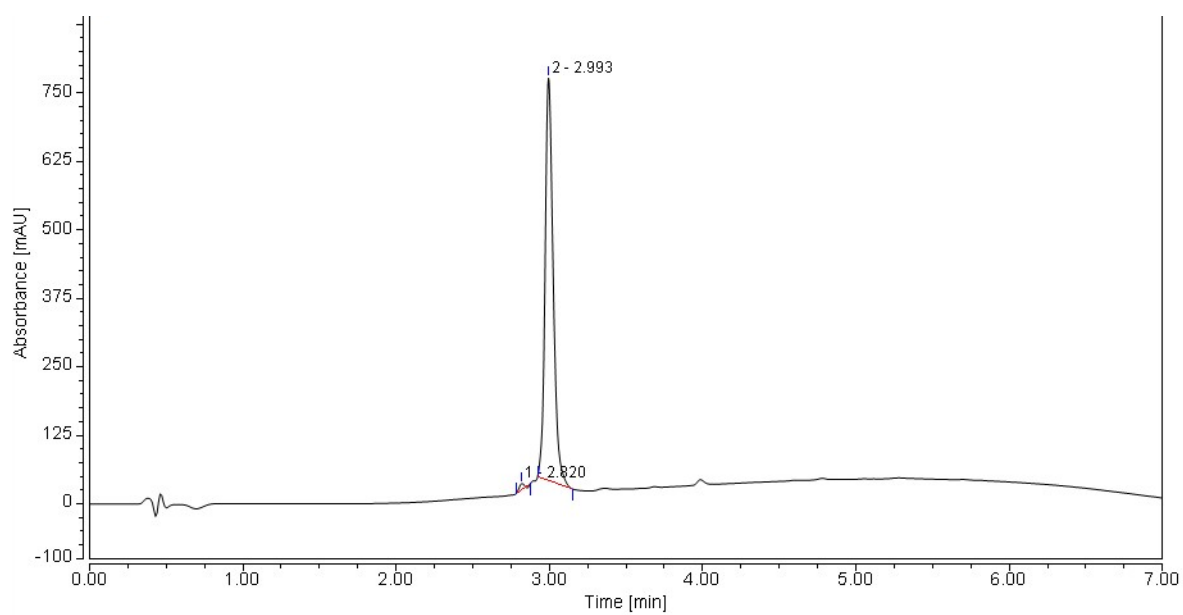

Figure SI-27. PPDM2211 peptide spectra

LCMS analysis

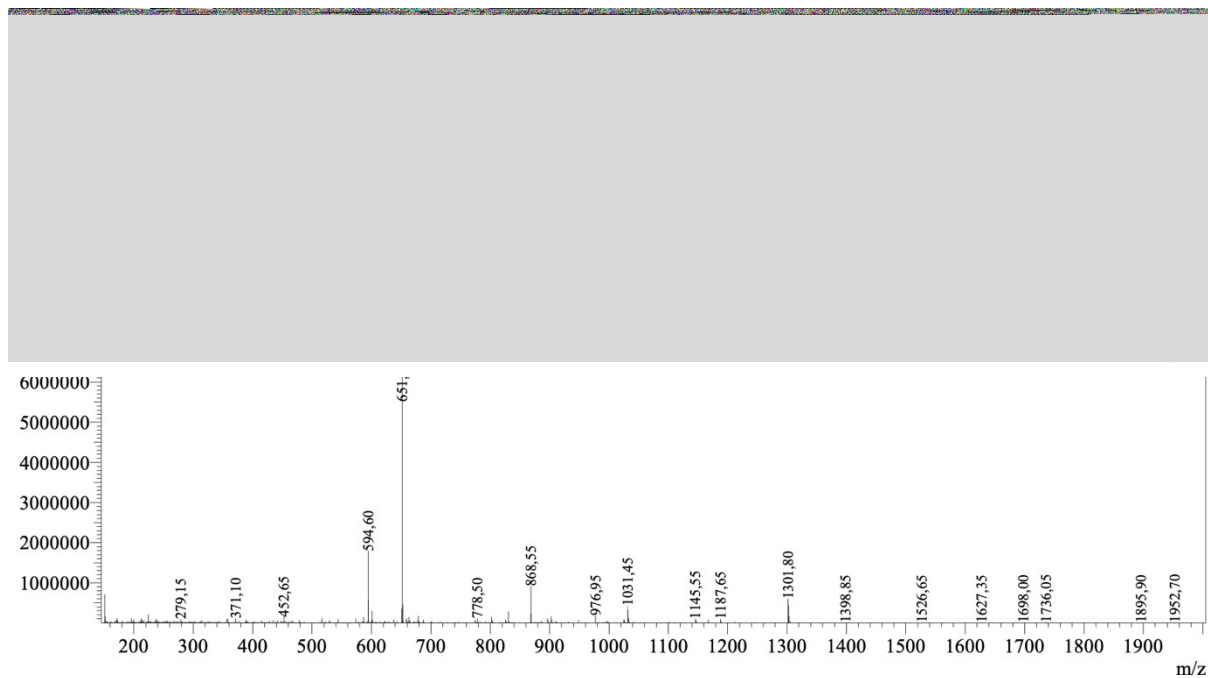

HPLC analysis

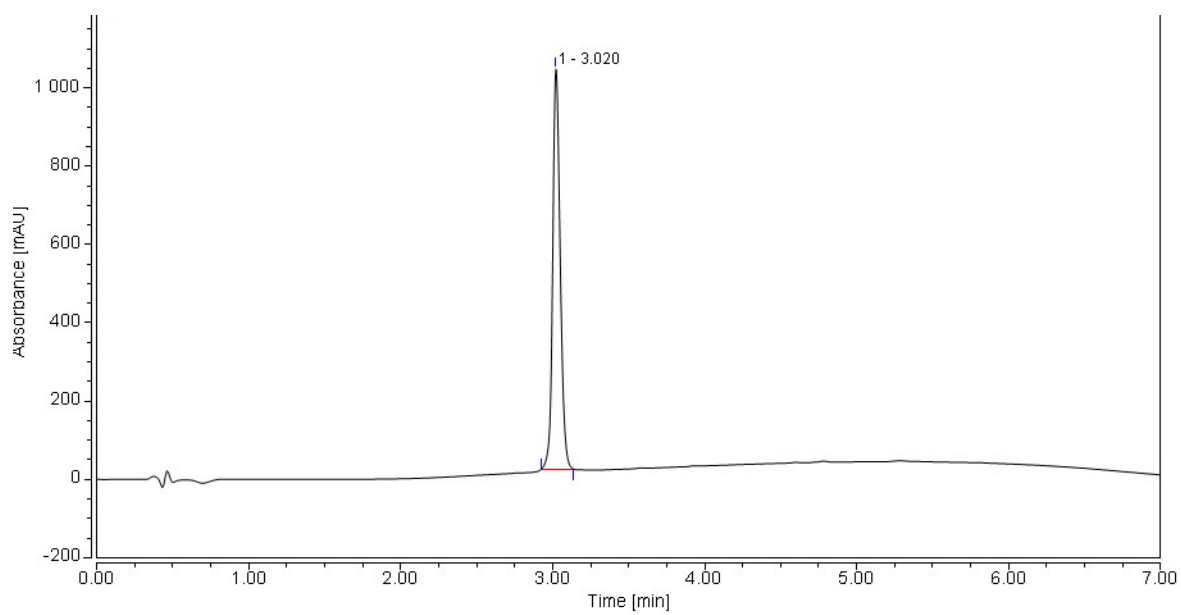

Figure SI-28. PPDM2215 peptide spectra

LCMS analysis

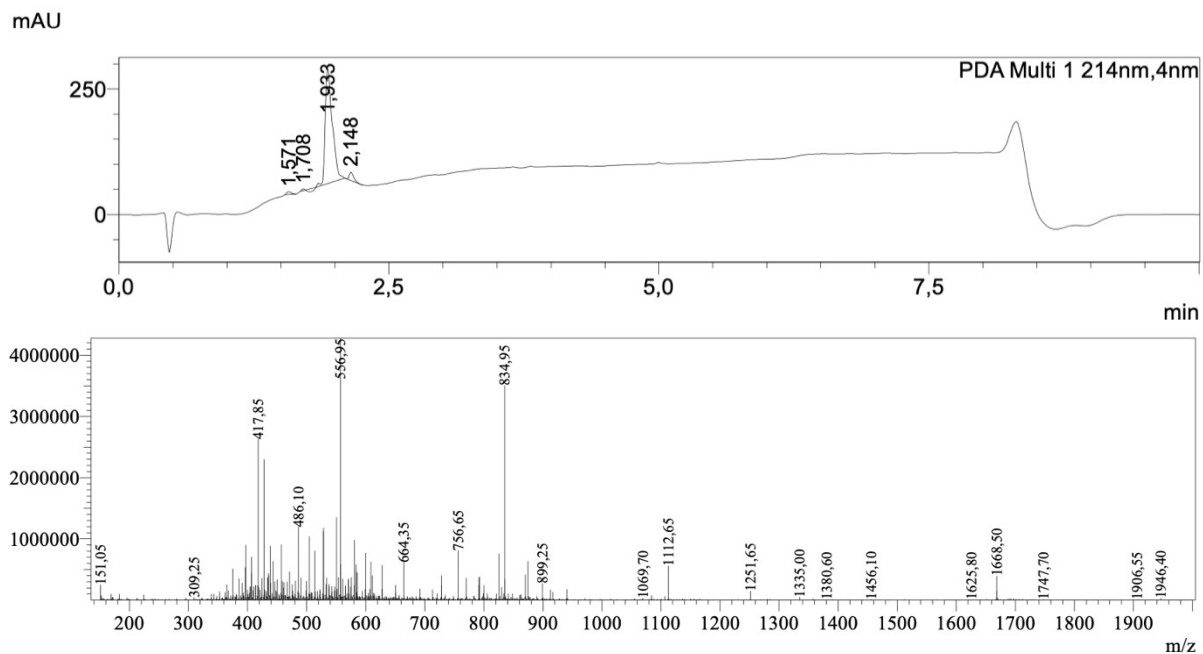

HPLC analysis

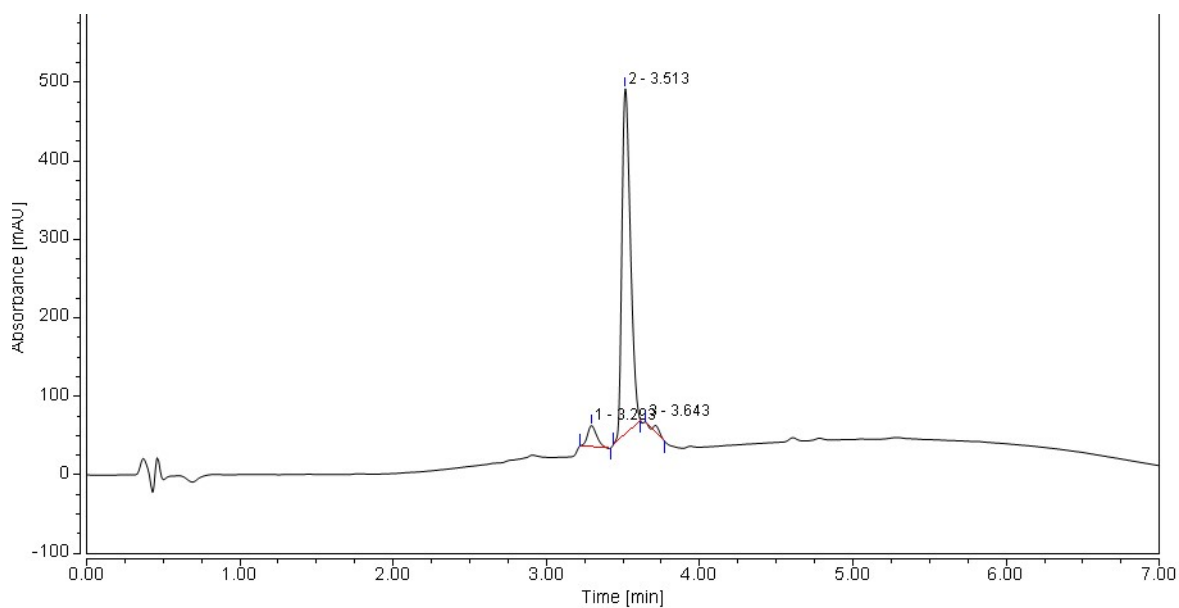

## IV. Biological Evaluation

ELISA experimental conditions

|                                      |                                                     |
|--------------------------------------|-----------------------------------------------------|
| <b>Protocol name:</b>                | WorkOut Protocol Tuesday, April 08, 2014 3:18:25 PM |
| <b>Protocol number:</b>              | N/A                                                 |
| <b>Name of the plate type:</b>       | OptiPlate 96                                        |
| <b>Number of wells in the plate:</b> | 8 X 12                                              |
| <b>Height of the plate:</b>          | 14.6 mm                                             |
| <b>Offset of the wells:</b>          | 11.240 mm, 14.380 mm                                |
| <b>Distance between wells:</b>       | 9.000 mm, 9.000 mm                                  |
| <b>Number of repeats:</b>            | 1                                                   |
| <b>Delay between repeats:</b>        | 0 s                                                 |
| <b>Measurement height:</b>           | 8.00 mm                                             |
| <b>Shaking duration:</b>             | 5.0 s                                               |
| <b>Shaking speed:</b>                | Normal                                              |
| <b>Shaking diameter:</b>             | 0.10 mm                                             |
| <b>Shaking type:</b>                 | Linear                                              |
| <b>Repeated operation:</b>           | Yes                                                 |
| <b>Delay duration:</b>               | 5.0 s                                               |
| <b>Repeated operation:</b>           | Yes                                                 |
| <b>Name of the label:</b>            | Absorbance @ 450 (1.0s)                             |
| <b>Label technology:</b>             | Photometry                                          |
| <b>CW-lamp filter name:</b>          | P450                                                |
| <b>CW-lamp filter slot:</b>          | A2                                                  |
| <b>Measurement time:</b>             | 1.0 s                                               |
| <b>Absorbance Mode:</b>              | Visible                                             |
| <b>Excitation Aperture:</b>          | N/A                                                 |
| <b>Protocol created by:</b>          | Victor User                                         |
| <b>Protocol creation date:</b>       | 08/04/2014                                          |
| <b>Protocol last edited by:</b>      | Victor User                                         |
| <b>Protocol last edited:</b>         | 08/12/2020                                          |

ELISA quantification results for DNMT1-DMAP1 co-immunoprecipitation

| Group      | Wells    | Absorbance @ 450 (1.0s) |         |
|------------|----------|-------------------------|---------|
| Blank1     | A1, A2   | 0,00782                 | 0,00873 |
| Input40%#1 | A3, A4   | 0,67272                 | 0,66527 |
| IP-IgG#1   | B3, B4   | 0,05272                 | 0,05177 |
| IP-DNMT1#1 | C3, C4   | 0,31254                 | 0,30052 |
| Input40#2  | D3, D4   | 0,62828                 | 0,62828 |
| IP-IgG#2   | E3, E4   | 0,04929                 | 0,05182 |
| IP-DNMT1#2 | F3, F4   | 0,27623                 | 0,28002 |
| Input40#3  | G3, G4   | 0,64522                 | 0,63998 |
| IP-IgG#3   | H3, H4   | 0,05887                 | 0,04872 |
| IP-DNMT1#3 | A5, A6   | 0,27652                 | 0,27544 |
| Input40%#1 | B5, B6   | 0,62623                 | 0,64522 |
| IP-IgG#1   | C5, C6   | 0,05877                 | 0,05688 |
| IP-DNMT1#1 | D5, D6   | 0,36621                 | 0,36882 |
| Input40#2  | E5, E6   | 0,66562                 | 0,65982 |
| IP-IgG#2   | F5, F6   | 0,05762                 | 0,05882 |
| IP-DNMT1#2 | G5, G6   | 0,40636                 | 0,41998 |
| Input40#3  | H5, H6   | 0,61721                 | 0,62012 |
| IP-IgG#3   | A7, A8   | 0,06002                 | 0,05926 |
| IP-DNMT1#3 | B7, B8   | 0,40622                 | 0,41002 |
| Input40%#1 | C7, C8   | 0,61723                 | 0,62009 |
| IP-IgG#1   | D7, D8   | 0,05982                 | 0,05872 |
| IP-DNMT1#1 | E7, E8   | 0,80032                 | 0,80392 |
| Input40#2  | F7, F8   | 0,59823                 | 0,59772 |
| IP-IgG#2   | G7, G8   | 0,06182                 | 0,06202 |
| IP-DNMT1#2 | H7, H8   | 0,83229                 | 0,83823 |
| Input40#3  | A9, A10  | 0,60082                 | 0,60119 |
| IP-IgG#3   | B9, B10  | 0,05782                 | 0,05972 |
| IP-DNMT1#3 | C9, C10  | 0,84723                 | 0,84113 |
| Input40%#1 | D9, D10  | 0,62732                 | 0,62882 |
| IP-IgG#1   | E9, E10  | 0,06272                 | 0,06182 |
| IP-DNMT1#1 | F9, F10  | 0,81923                 | 0,82009 |
| Input40#2  | G9, G10  | 0,59837                 | 0,58927 |
| IP-IgG#2   | H9, H10  | 0,06188                 | 0,06172 |
| IP-DNMT1#2 | A11, A12 | 0,79082                 | 0,79882 |
| Input40#3  | B11, B12 | 0,59122                 | 0,59817 |
| IP-IgG#3   | C11, C12 | 0,06002                 | 0,05987 |
| IP-DNMT1#3 | D11, D12 | 0,78223                 | 0,77982 |
| Unknown37  | E11, E12 | 0,00035                 | 0,00044 |
| Unknown38  | F11, F12 | 0,00047                 | 0,00018 |
| Unknown39  | G11, G12 | 0,00034                 | 0,00036 |
| Unknown40  | H11, H12 | 0,00015                 | 0,00012 |
| 78,125     | B1, B2   | 0,03877                 | 0,03698 |
| 156,25     | C1, C2   | 0,08252                 | 0,08352 |
| 312,5      | D1, D2   | 0,18762                 | 0,17897 |
| 625        | E1, E2   | 0,37621                 | 0,37821 |
| 1250       | F1, F2   | 0,76721                 | 0,75751 |
| 2500       | G1, G2   | 1,32721                 | 1,30922 |
| 5000       | H1, H2   | 2,52421                 | 2,49982 |

ELISA quantification results for DNMT1-UHRF1 co-immunoprecipitation

| Group      | Wells    | Absorbance @ 450 (1.0s) |         |
|------------|----------|-------------------------|---------|
| Blank1     | A1, A2   | 0,01872                 | 0,01362 |
| Input40%#1 | A3, A4   | 1,30723                 | 1,31021 |
| IP-IgG#1   | B3, B4   | 0,07732                 | 0,07418 |
| IP-DNMT1#1 | C3, C4   | 1,28568                 | 1,28845 |
| Input40#2  | D3, D4   | 1,28323                 | 1,28307 |
| IP-IgG#2   | E3, E4   | 0,06554                 | 0,06272 |
| IP-DNMT1#2 | F3, F4   | 1,29482                 | 1,31304 |
| Input40#3  | G3, G4   | 1,39543                 | 1,39482 |
| IP-IgG#3   | H3, H4   | 0,06395                 | 0,06273 |
| IP-DNMT1#3 | A5, A6   | 1,23677                 | 1,20664 |
| Input40%#1 | B5, B6   | 1,28723                 | 1,29021 |
| IP-IgG#1   | C5, C6   | 0,06340                 | 0,06420 |
| IP-DNMT1#1 | D5, D6   | 1,28091                 | 1,29550 |
| Input40#2  | E5, E6   | 1,18620                 | 1,16941 |
| IP-IgG#2   | F5, F6   | 0,06670                 | 0,06740 |
| IP-DNMT1#2 | G5, G6   | 1,24860                 | 1,25830 |
| Input40#3  | H5, H6   | 1,39250                 | 1,38600 |
| IP-IgG#3   | A7, A8   | 0,06520                 | 0,06180 |
| IP-DNMT1#3 | B7, B8   | 1,19780                 | 1,24900 |
| Input40%#1 | C7, C8   | 1,18723                 | 1,17021 |
| IP-IgG#1   | D7, D8   | 0,06305                 | 0,06749 |
| IP-DNMT1#1 | E7, E8   | 0,10296                 | 0,10280 |
| Input40#2  | F7, F8   | 1,38702                 | 1,39272 |
| IP-IgG#2   | G7, G8   | 0,06480                 | 0,06400 |
| IP-DNMT1#2 | H7, H8   | 0,09211                 | 0,10637 |
| Input40#3  | A9, A10  | 1,32175                 | 1,31930 |
| IP-IgG#3   | B9, B10  | 0,06537                 | 0,06544 |
| IP-DNMT1#3 | C9, C10  | 0,15753                 | 0,10558 |
| Input40%#1 | D9, D10  | 1,28723                 | 1,29021 |
| IP-IgG#1   | E9, E10  | 0,06557                 | 0,06655 |
| IP-DNMT1#1 | F9, F10  | 1,19875                 | 1,20054 |
| Input40#2  | G9, G10  | 1,39062                 | 1,38530 |
| IP-IgG#2   | H9, H10  | 0,06641                 | 0,06187 |
| IP-DNMT1#2 | A11, A12 | 1,20463                 | 1,23758 |
| Input40#3  | B11, B12 | 1,18756                 | 1,18921 |
| IP-IgG#3   | C11, C12 | 0,06337                 | 0,07098 |
| IP-DNMT1#3 | D11, D12 | 1,26546                 | 1,27025 |
| Unknown37  | E11, E12 | 0,00087                 | 0,00031 |
| Unknown38  | F11, F12 | 0,00056                 | 0,00047 |
| Unknown39  | G11, G12 | 0,00031                 | 0,00048 |
| Unknown40  | H11, H12 | 0,00027                 | 0,00029 |
| 15,625     | B1, B2   | 0,04252                 | 0,04510 |
| 31,25      | C1, C2   | 0,09871                 | 0,09271 |
| 62,5       | D1, D2   | 0,18232                 | 0,19002 |
| 125        | E1, E2   | 0,37662                 | 0,38002 |
| 250        | F1, F2   | 0,72625                 | 0,75119 |
| 500        | G1, G2   | 1,28322                 | 1,30002 |
| 1000       | H1, H2   | 2,37232                 | 2,40023 |

ELISA quantification results for DNMT1-DNMT1 co-immunoprecipitation

| Group      | Wells    | Absorbance @ 450 (1.0s) |         |
|------------|----------|-------------------------|---------|
| Blank1     | A1, A2   | 0,00291                 | 0,03092 |
| Input40%#1 | A3, A4   | 0,51423                 | 0,52982 |
| IP-IgG#1   | B3, B4   | 0,00403                 | 0,00387 |
| IP-DNMT1#1 | C3, C4   | 0,63872                 | 0,62187 |
| Input40#2  | D3, D4   | 0,50092                 | 0,48982 |
| IP-IgG#2   | E3, E4   | 0,00365                 | 0,03920 |
| IP-DNMT1#2 | F3, F4   | 0,62982                 | 0,63823 |
| Input40#3  | G3, G4   | 0,48739                 | 0,49003 |
| IP-IgG#3   | H3, H4   | 0,03282                 | 0,03172 |
| IP-DNMT1#3 | A5, A6   | 0,65422                 | 0,65002 |
| Input40%#1 | B5, B6   | 0,50032                 | 0,50102 |
| IP-IgG#1   | C5, C6   | 0,00287                 | 0,00382 |
| IP-DNMT1#1 | D5, D6   | 0,62773                 | 0,63098 |
| Input40#2  | E5, E6   | 0,47883                 | 0,48039 |
| IP-IgG#2   | F5, F6   | 0,00278                 | 0,00276 |
| IP-DNMT1#2 | G5, G6   | 0,64832                 | 0,65172 |
| Input40#3  | H5, H6   | 0,49382                 | 0,48983 |
| IP-IgG#3   | A7, A8   | 0,00276                 | 0,00300 |
| IP-DNMT1#3 | B7, B8   | 0,62723                 | 0,63098 |
| Input40%#1 | C7, C8   | 0,51723                 | 0,51082 |
| IP-IgG#1   | D7, D8   | 0,00302                 | 0,00287 |
| IP-DNMT1#1 | E7, E8   | 0,63982                 | 0,64992 |
| Input40#2  | F7, F8   | 0,48739                 | 0,48372 |
| IP-IgG#2   | G7, G8   | 0,00382                 | 0,00318 |
| IP-DNMT1#2 | H7, H8   | 0,63921                 | 0,63723 |
| Input40#3  | A9, A10  | 0,49930                 | 0,49291 |
| IP-IgG#3   | B9, B10  | 0,00382                 | 0,00403 |
| IP-DNMT1#3 | C9, C10  | 0,62823                 | 0,63981 |
| Input40%#1 | D9, D10  | 0,52432                 | 0,51998 |
| IP-IgG#1   | E9, E10  | 0,00327                 | 0,00312 |
| IP-DNMT1#1 | F9, F10  | 0,64029                 | 0,64001 |
| Input40#2  | G9, G10  | 0,50292                 | 0,50119 |
| IP-IgG#2   | H9, H10  | 0,00287                 | 0,00298 |
| IP-DNMT1#2 | A11, A12 | 0,63118                 | 0,63422 |
| Input40#3  | B11, B12 | 0,48732                 | 0,48873 |
| IP-IgG#3   | C11, C12 | 0,00302                 | 0,00318 |
| IP-DNMT1#3 | D11, D12 | 0,61262                 | 0,62009 |
| Unknown37  | E11, E12 | 0,00066                 | 0,00061 |
| Unknown38  | F11, F12 | 0,00049                 | 0,00045 |
| Unknown39  | G11, G12 | 0,00058                 | ?00028  |
| Unknown40  | H11, H12 | 0,00046                 | 0,00039 |
| 1          | B1, B2   | 0,07862                 | 0,08102 |
| 2          | C1, C2   | 0,18762                 | 0,17652 |
| 4          | D1, D2   | 0,30723                 | 0,31098 |
| 10         | E1, E2   | 0,43423                 | 0,42316 |
| 20         | F1, F2   | 0,61512                 | 0,60092 |
| 40         | G1, G2   | 0,75353                 | 0,76522 |
| Standard7  | H1, H2   | 0,00052                 | 0,00047 |
